1 **Starvation-induced regulation of carbohydrate transport at the blood-**  
2 **brain barrier is TGF- $\beta$ -signaling dependent**

3

4 Helen Hertenstein<sup>1</sup>, Ellen McMullen<sup>1</sup>, Astrid Weiler<sup>1</sup>, Anne Volkenhoff<sup>1</sup>, Holger  
5 M. Becker<sup>2</sup>, and Stefanie Schirmeier<sup>1\*</sup>

6

7 1 Institut für Neuro- und Verhaltensbiologie, WWU Münster, D-48149  
8 Münster, Germany

9 2 Division of General Zoology, Department of Biology, University of  
10 Kaiserslautern, D-67653 Kaiserslautern, Germany

11 \* correspondence: [stefanie.schirmeier@wwu.de](mailto:stefanie.schirmeier@wwu.de)

12

## 13 **Abstract**

14 During hunger or malnutrition animals prioritize alimentation of the brain over  
15 other organs to ensure its function and thus their survival. This so-called brain  
16 sparing is described from *Drosophila* to humans. However, little is known  
17 about the molecular mechanisms adapting carbohydrate transport. Here, we  
18 used *Drosophila* genetics to unravel the mechanisms operating at the blood-  
19 brain barrier (BBB) under nutrient restriction. During starvation, expression of  
20 the carbohydrate transporter Tret1-1 is increased to provide more efficient  
21 carbohydrate uptake. Two mechanisms are responsible for this increase.  
22 Similarly to the regulation of mammalian GLUT4, Rab-dependent intracellular  
23 shuttling is needed for Tret1-1 integration into the plasma membrane, even  
24 though Tret1-1 regulation is independent of insulin signaling. In addition,  
25 starvation induces transcriptional upregulation controlled by TGF- $\beta$  signaling.  
26 Considering TGF- $\beta$ -dependent regulation of the glucose transporter GLUT1 in  
27 murine chondrocytes, our study reveals an evolutionarily conserved regulatory  
28 paradigm adapting the expression of sugar transporters at the BBB.

## 29 **Keywords**

30 blood-brain barrier / brain sparing / carbohydrate transport / TGF- $\beta$  signaling

## 31 **Introduction**

32 A functional nervous system is essential for an animal's survival. To properly  
33 function, the nervous system needs a disproportionately large amount of  
34 energy relative to its size. The human brain for example accounts for only  
35 about 2% of the body's weight but uses around 20% of the resting oxygen  
36 consumption (Laughlin et al., 1998). Similarly, the insect retina consumes  
37 approximately 10% of the total ATP generated (Harris et al., 2012; Laughlin et  
38 al., 1998; Mink et al., 1981).

39 The nervous system is very susceptible to changing extracellular solute  
40 concentrations and thus needs to be separated from circulation. This task is  
41 performed by the blood-brain barrier (BBB), which prevents paracellular  
42 diffusion, and thereby uncontrolled influx of ions, metabolites, xenobiotics,

43 pathogens and other blood-derived potentially harmful substances. Protein,  
44 ion and metabolite concentrations fluctuate much stronger in circulation than  
45 in the cerebrospinal fluid, the brains extracellular milieu (Begley, 2006). Thus,  
46 fluxes over the BBB must be tightly regulated and only small lipid soluble  
47 molecules and gases like O<sub>2</sub> and CO<sub>2</sub> can diffuse freely (van de Waterbeemd  
48 et al., 1998).

49 The enormous energy demand of the nervous system is mainly met by  
50 carbohydrate metabolism. The human brain takes up approximately 90 g  
51 glucose per day during adulthood, and up to 150 g per day during  
52 development (Kuzawa et al., 2014). Since glucose and other carbohydrates  
53 are hydrophilic molecules, free diffusion over the BBB is impossible.  
54 Therefore, carbohydrates need to be transported into the nervous system via  
55 specialized transport proteins. In mammals, Glucose transporter 1 (GLUT1,  
56 encoded by the *Slc2a1* (*solute carrier family 2 member 1*) gene) is considered  
57 to be the main carbohydrate transporter in the BBB-forming endothelial cells.  
58 Aberrations in carbohydrate availability or transport are thought to be a major  
59 factor in the development of diverse neurological diseases such as Glut1  
60 deficiency syndrome, Alzheimer's disease or epilepsy (Arsov et al., 2012;  
61 Hoffmann et al., 2013; Kapogiannis and Mattson, 2011; Koepsell, 2020).  
62 Therefore, understanding the regulatory mechanisms that govern  
63 carbohydrate transport into the nervous system is of major interest.  
64 Interestingly, it has been reported that endothelial GLUT1 expression is  
65 increased upon hypoglycemia (Boado and Pardridge, 1993; Kumagai et al.,  
66 1995; Simpson et al., 1999, reviewed in Patching, 2016; Rehni and Dave,  
67 2018). However, the molecular mechanisms that control this upregulation are  
68 not yet understood. In addition, upon oxygen or glucose deprivation that are a  
69 consequence of ischemia, expression of the sodium glucose cotransporters  
70 SGLT1 (*Slc5a1*) and SGLT2 (*Slc5a2*) is induced in brain endothelial cells  
71 (Elfeber et al., 2004; Enerson and Drewes, 2006; Nishizaki et al., 1995;  
72 Nishizaki and Matsuoka, 1998; Vemula et al., 2009; Yu et al., 2013). Overall,  
73 this indicates that carbohydrate transport at the BBB can adapt to changes in  
74 carbohydrate availability in various ways. However, the molecular  
75 underpinnings of the different regulatory processes are still elusive.

76 Similarly to vertebrates, the insect nervous system must be protected by a  
77 BBB. Since insects have an open circulatory system the brain is not  
78 vascularized but is surrounded by the blood-like hemolymph. In *Drosophila*  
79 the BBB surrounds the entire nervous system to prevent uncontrolled entry of  
80 hemolymph-derived substances. It is formed by two glial cell layers, the outer  
81 perineurial and inner subperineurial glial cells (reviewed in Limmer et al.,  
82 2014; Yildirim et al., 2019). The *Drosophila* BBB shares fundamental  
83 functional aspects with the vertebrate BBB. The subperineurial glial cells build  
84 a diffusion barrier by forming intercellular pleated septate junctions that  
85 prevent paracellular diffusion (Stork et al., 2008). In addition, efflux  
86 transporters export xenobiotics and many solute carrier (SLC) family  
87 transporters supply the brain with essential ions and nutrients (Desalvo et al.,  
88 2014; Hindle and Bainton, 2014; Lane and Treherne, 1972; Mayer and  
89 Belsham, 2009; Stork et al., 2008; reviewed in Weiler et al., 2017). In the  
90 *Drosophila* hemolymph, in addition to glucose, trehalose, a non-reducing  
91 disaccharide consisting of two glucose subunits linked by an  $\alpha,\alpha$ -1,1-  
92 glycosidic bond, is found in high quantities. Fructose is also present albeit in  
93 low and highly fluctuating concentrations, making its nutritional role  
94 questionable (Blatt and Roces, 2001; Broughton et al., 2008; Lee and Park,  
95 2004; Pasco and Léopold, 2012; Wyatt and Kalf, 1957). Transcriptome data of  
96 the BBB-forming glial cells suggests expression of several putative  
97 carbohydrate transporters (Desalvo et al., 2014; Ho et al., 2019). The closest  
98 homologues of mammalian GLUT1-4 are dmGlut1, dmSut1, dmSut2, dmSut3  
99 and CG7882. dmGlut1 has been shown to be expressed exclusively in  
100 neurons (Volkenhoff et al., 2018). *In situ*, microarray and single cell  
101 sequencing data indicate very low or no expression for dmSut1-3 and  
102 CG7882 in the nervous system (Croset et al., 2018; Davie et al., 2018;  
103 Weiszmann et al., 2009). The carbohydrate transporter Tret1-1 (Trehalose  
104 transporter 1-1) is specifically expressed in perineurial glia (Volkenhoff et al.,  
105 2015). Tret1-1 is most homologous to mammalian GLUT6 and GLUT8 and  
106 has been shown to transport trehalose when heterologously expressed in  
107 *Xenopus laevis* oocytes (Kanamori et al., 2010).

108 The *Drosophila* nervous system, as the mammalian nervous system, is  
109 protected from the effects of malnutrition through a process called brain  
110 sparing. It has been shown that upon nutrient restriction neuroblasts (neural  
111 stem cells) can still divide and are thus protected from the growth defects that  
112 are caused by a lack of proper nutrition in other tissues (reviewed in Lanet  
113 and Maurange, 2014). This protection is achieved by Jelly belly  
114 (Jeb)/Anaplastic lymphoma kinase (ALK) signaling that constitutes an  
115 alternative growth promoting pathway active in neuroblasts (Cheng et al.,  
116 2011). However, if the brain continues developing and keeps its normal  
117 function, nutrient provision needs to be adapted to ensure sufficient uptake,  
118 even under challenging circumstances, like low circulating carbohydrate  
119 levels. How nutrient transport at the BBB is adapted to meet the needs of the  
120 nervous system even under nutrient restriction has not been studied.

121 Here, we show that carbohydrate transporter expression in *Drosophila* as in  
122 mammals adapts to changes in carbohydrate availability in circulation. *Tret1-1*  
123 expression in perineurial glia of *Drosophila* larvae is strongly upregulated  
124 upon starvation. This upregulation is triggered by starvation-induced  
125 hypoglycemia as a mechanism protecting the nervous system from the effects  
126 of nutrient restriction. *Ex vivo* glucose uptake measurements using a  
127 genetically encoded FRET-based glucose sensor show that the upregulation  
128 of carbohydrate transporter expression leads to an increase in carbohydrate  
129 uptake efficiency. The compensatory upregulation of *Tret1-1* transcription is  
130 independent of insulin/adipokinetic hormone signaling, but instead depends  
131 on TGF- $\beta$  signaling. This regulatory mechanism that allows sparing the brain  
132 from the effects of malnutrition is likely conserved in mammals, since  
133 mammalian Glut1 is also upregulated in the BBB upon hypoglycemia and has  
134 been shown to be induced by TGF- $\beta$  signaling in other tissues (Boado and  
135 Pardridge, 1993; Kumagai et al., 1995; Simpson et al., 1999; Lee et al., 2018).

## 136 **Results**

137 *Tret1-1* is upregulated in perineurial glial cells upon starvation

138 The *Drosophila* larval brain is separated from circulation by the blood-brain  
139 barrier to avoid uncontrolled leakage of hemolymph-derived potentially  
140 harmful substances. At the same time, the blood-brain barrier also cuts off the  
141 brain from nutrients available in the hemolymph. Thus, transport systems are  
142 necessary to ensure a constant supply of nutrients, including carbohydrates.  
143 The trehalose transporter Tret1-1 is expressed in the perineurial glial cells of  
144 the larval and adult nervous system (Volkenhoff et al., 2015). In order to better  
145 understand whether carbohydrate transport at the BBB is adapted to the  
146 metabolic state of the animal, we analyzed Tret1-1 dynamics under different  
147 physiological conditions. In fed animals Tret1-1 can be found at the plasma  
148 membrane of the perineurial glial cells, but a large portion localizes to  
149 intracellular vesicles (Figure 1A, Volkenhoff et al., 2015). We subjected wild  
150 type larvae to chronic starvation applying a well-established paradigm that  
151 allows 48 h of starvation without disturbing development (Zinke et al., 2002).  
152 Starvation increases Tret1-1 protein levels in the perineurial glial cells (Figure  
153 1A). Furthermore, an enrichment of Tret1-1 protein at the plasma membrane  
154 was observed (Figure 1A, asterisk), showing that starvation induces changes  
155 in Tret1-1 levels as well as localization.

#### 156 *Intracellular trafficking of Tret1-1 is Rab7 and Rab10 dependent*

157 Three mammalian Glucose transporters, GLUT4, GLUT6 and GLUT8, are  
158 regulated via trafficking between storage vesicles and the plasma membrane  
159 (Corvera et al., 1994; Cushman and Wardzala, 1980; Lisinski et al., 2001;  
160 Suzuki and Kono, 1980). Similarly, a large amount of Tret1-1 localizes to  
161 intracellular vesicles (Figure 1A). Thus, intracellular trafficking of Tret1-1 may  
162 partially regulate carbohydrate uptake into the perineurial glial cells.

163 To analyze if regulation of Tret1-1 expression requires intracellular trafficking,  
164 we studied the involvement of different Rab-GTPases. Utilizing an EYFP-Rab  
165 library available for *Drosophila* (Dunst et al., 2015) we found that subsets of  
166 Tret1-1 positive vesicles are also positive for Rab7, Rab10, Rab19 and Rab23  
167 (Figure S1). Rab7 is needed for the formation of late endosomes and their  
168 fusion with lysosomes, while Rab10 has been implicated in GLUT4 storage  
169 vesicle trafficking in mammals (reviewed in Guerra and Bucci, 2016; Huotari

170 and Helenius, 2011; Klip et al., 2019). The roles of Rab19 and Rab23 are less  
171 well understood. Rab23 has been implicated in planar cell polarity and in  
172 Hedgehog regulation in response to dietary changes, but its exact functions  
173 are unclear (Çiçek et al., 2016; Pataki et al., 2010). Rab19 has been  
174 described to act in enteroendocrine cell differentiation, but its role in this  
175 process is unknown (Nagy et al., 2017).

176 To determine a possible functional role of these Rab-GTPases in regulating  
177 Tret1-1 trafficking, we analyzed Tret1-1 localization in the background of a  
178 glia-specific knockdown (or expression of dominant-negative forms) of the  
179 respective Rab proteins (Figure 2A,B). Silencing of Rab19 or Rab23 did not  
180 induce any misregulation or mislocalization of Tret1-1 in perineurial glial cells  
181 (data not shown). In contrast, interfering with Rab7 or Rab10 function induced  
182 distinct abnormal phenotypes (Figure 2). Panglial and BBB-glia cell-specific  
183 knockdown of Rab7 using RNA interference or expression of a dominant-  
184 negative form of Rab7, Rab7<sup>T22N</sup>, reduced the levels of Tret1-1 (Figure 2).  
185 The dominant-negative Rab-constructs used here are tagged with an N-  
186 terminal YFP and thus induce a weak background staining in all glial cells  
187 (Figure 2B, asterisks). The reduced Tret1-1 level in Rab7 loss of function  
188 indicates that blocking late endosome to lysosome maturation and thus  
189 possibly blocking Tret1-1 degradation, induces a negative feedback that  
190 reduces Tret1-1 expression.

191 In contrast to Rab7, knockdown of Rab10 in all glia, or in the BBB-glia cells  
192 specifically, leads to a prominent accumulation of Tret1-1 in the perineurial  
193 cytosol (Figure 2). This phenotype was reproduced when a dominant-negative  
194 form of Rab10, Rab10<sup>T23N</sup>, was expressed in glial cells, suggesting a major  
195 role of Rab10 in delivering Tret1-1 to the plasma membrane of perineurial glial  
196 cells. In summary, Tret1-1 homeostasis is dependent on Rab-GTPase-  
197 mediated intracellular trafficking.

#### 198 *Increase in Tret1-1 expression upon starvation is sugar-dependent*

199 The expression of mammalian Glut1 in brain endothelial cells increases upon  
200 chronic hypoglycemia (Boado and Pardridge, 1993; Kumagai et al., 1995;



201 Rehni and Dave, 2018; Simpson et al., 1999). In *Drosophila*, starvation results  
202 in hypoglycemia (Dus et al., 2011; Matsuda et al., 2015). Thus, we wondered  
203 if the increase in Tret1-1 protein levels described here might be induced by a  
204 reduction in circulating carbohydrate levels. To understand if dietary  
205 carbohydrates are sufficient to circumvent Tret1-1 induction, we compared  
206 animals fed on standard food, starved animals, and animals fed on 10 %  
207 sucrose in phosphate-buffered saline. Larvae kept on sugar-only food display  
208 comparable Tret1-1 levels as larvae kept on standard food (Figure 1B,C).  
209 Hence, dietary sugar abolishes Tret1-1 induction, indicating that other  
210 nutrients, like amino acids are not important for this signaling pathway (Figure  
211 1B,C). Attempts to analyze Tret1-1 levels in larvae fed on a protein-only diet  
212 to study the influence of dietary amino acids were unsuccessful as larvae do  
213 not eat protein-only diet (no uptake of colored protein-only food into the  
214 intestine over 48 h, data not shown). This data suggests that Tret1-1 is  
215 upregulated in the perineurial glial cells upon starvation-induced  
216 hypoglycemia. Such an increase in Tret1-1 protein levels could be due to  
217 transcriptional regulation or posttranscriptional mechanisms interfering with  
218 translation or protein stability.

#### 219 *Tret1-1 is transcriptionally regulated upon starvation*

220 To test whether transcriptional regulation accounts for the strong increase in  
221 Tret1-1 protein upon starvation, we cloned the *tret1-1* promotor and  
222 established transgenic animals expressing either Gal4 or a nuclear GFP  
223 (stinger-GFP, stgGFP) under its control (Figure S2). We validated the  
224 expression induced by the promotor fragment by co-staining RFP expressed  
225 under *tret1-1-Gal4* control with the Tret1-1 antibody we generated previously  
226 (Volkenhoff et al., 2015). *tret1-1* promotor expression and Tret1-1 protein  
227 colocalize well in the nervous system (Figure S2B). We previously showed  
228 that Tret1-1 localizes to perineurial glial cells and some unidentified neurons  
229 (Volkenhoff et al., 2015). To further verify perineurial glial expression, we  
230 stained *tret1-1-stgGFP* animals for a nuclear perineurial glial marker, Apontic  
231 (Figure S2C, Zülbahar et al., 2018). Apontic and stgGFP colocalize in  
232 perineurial nuclei.



233 To analyze changes in *tret1-1* transcription levels, we subjected animals  
234 expressing stgGFP under the control of the *tret1-1* promoter to our starvation  
235 paradigm. Starvation induces a robust increase of stgGFP in the brains of  
236 starved larvae as quantified by Western Blot (Figure 3). These experiments  
237 show that the *tret1-1* promoter is induced upon starvation and thus Tret1-1  
238 levels are transcriptionally adapted to the animal's metabolic state.

### 239 *Glucose uptake rate increases upon starvation*

240 Tret1-1 upregulation in perineurial glial cells is most likely a mechanism that  
241 ensures efficient carbohydrate uptake into the nervous system even under  
242 conditions of low circulating carbohydrate levels. Therefore, we aimed to  
243 study the impact of Tret1-1 upregulation on carbohydrate uptake at the BBB.  
244 Kanamori et al., 2010 showed that Tret1-1 transports trehalose when  
245 heterologously expressed in *Xenopus laevis* oocytes. Since not only trehalose  
246 but also glucose and fructose are found in the *Drosophila* hemolymph, we  
247 analyzed whether Tret1-1 also transports other carbohydrates. Therefore, we  
248 expressed Tret1-1 in *Xenopus laevis* oocytes to study its substrate specificity.  
249 The Tret1-1 antibody is specific to the Tret1-1PA isoform, and thus at least  
250 this isoform is upregulated in the perineurial glial cells upon starvation.  
251 Therefore, we expressed a 3xHA-tagged version of Tret1-1PA in *Xenopus*  
252 *laevis* oocytes. The functionality of this construct was verified by its ability to  
253 rescue the lethality associated with *tret1-1<sup>-/-</sup>* mutants when ubiquitously  
254 expressed (using *da-Gal4*, Volkenhoff et al., 2015). Incubating *Xenopus laevis*  
255 oocytes expressing Tret1-1PA-3xHA with different concentrations of <sup>14</sup>C<sub>6</sub>-  
256 fructose, <sup>14</sup>C<sub>6</sub>-glucose or <sup>14</sup>C<sub>12</sub>-trehalose for 60 min, we were able to verify the  
257 trehalose transport capacity reported previously (Kanamori et al., 2010)  
258 (Figure 4A). In addition, Tret1-1PA can facilitate uptake of glucose, while  
259 fructose is not taken up efficiently (Figure 4A).

260 Taking advantage of the glucose transport capacity of Tret1-1, we employed  
261 the Förster resonance energy transfer (FRET)-based glucose sensor  
262 FLII<sup>12</sup>Pglu-700μδ6 (Takanaga et al., 2008; Volkenhoff et al., 2018) to  
263 determine the effect of Tret1-1 upregulation on carbohydrate import into the  
264 living brain. A trehalose sensor to measure trehalose uptake is unfortunately

265 not available. However, the glucose sensor allows live imaging of glucose  
266 uptake in a cell type of choice in *ex vivo* brain preparations (Volkenhoff et al.,  
267 2018). We expressed FLII<sup>12</sup>Pglu-700 $\mu$ δ6 specifically in the BBB glial cells  
268 (9137-Gal4, Desalvo et al., 2014). The respective larvae were subjected to  
269 the starvation protocol and, subsequently, glucose uptake was measured  
270 (Figure 4B,C). The rate of glucose uptake was significantly increased in brains  
271 of starved animals compared to the brains of age-matched animals kept on  
272 standard food (Figure 4B,C). These findings show that, indeed, carbohydrate  
273 uptake into the brain is more efficient in starved animals. Such improved  
274 carbohydrate uptake most likely protects the brain from the effects of low  
275 circulating carbohydrate levels.

276 *Starvation-induced upregulation of Tret1-1 is insulin- and adipokinetic*  
277 *hormone-independent.*

278 The plasma membrane localization of mammalian GLUT4 is regulated by  
279 insulin (reviewed in Klip et al., 2019). Since starvation changes circulating  
280 carbohydrate levels, it has strong effects on insulin and adipokinetic hormone  
281 (AKH) signaling (reviewed in Nässel et al., 2015). Thus, insulin/AKH signaling  
282 may control Tret1-1 induction upon starvation. To study the implication of  
283 insulin signaling we expressed dominant-negative forms of the insulin  
284 receptor (InR, InR<sup>K1409A</sup> and InR<sup>R418P</sup>) in the BBB-forming glial cells (Figure  
285 5A,B). If Insulin signaling was to directly regulate Tret1-1 transcription, one  
286 would assume a negative effect, since *tret1-1* is upregulated upon starvation  
287 when insulin levels are low. If insulin signaling indeed has a negative effect on  
288 *tret1-1* expression, higher Tret1-1 levels would be expected under fed  
289 conditions upon expression of a dominant-negative InR. Expression of  
290 dominant-negative forms of InR did not changed Tret1-1 levels in fed animals  
291 in comparison to the control (Figure 5A). In addition, Tret1-1 upregulation  
292 upon starvation was indistinguishable from that observed in control animals  
293 (Figure 5A,B), indicating that Tret1-1 transcription is independent of insulin  
294 signaling.

295 In *Drosophila*, AKH is thought to play a role equivalent to  
296 glucagon/glucocorticoid signaling in mammals (Gáliková et al., 2015). AKH

297 signaling induces lipid mobilization and foraging behavior, at least in the adult  
298 animal (Gáliková et al., 2015). Thus, AKH signaling would be a good  
299 candidate to induce *Tret1-1* upregulation upon starvation. We analyzed *Tret1-*  
300 1 levels in *Akh*<sup>-/-</sup> (*Akh*<sup>SAP</sup> and *Akh*<sup>AP</sup>) mutant animals under normal conditions  
301 and starvation. *Tret1-1* levels in the perineurial glial cells in both fed *Akh*<sup>-/-</sup>  
302 mutant larvae are indistinguishable from control levels (Figure 5C).  
303 Interestingly, *Tret1-1* is still induced upon starvation in *Akh*<sup>-/-</sup> mutant animals  
304 (Figure 5C,D). This suggests that AKH does not play a role in *Tret1-1*  
305 regulation upon starvation. In summary, the core signaling pathways  
306 regulating organismal nutrient homeostasis, Insulin and AKH signaling, are  
307 not involved in *Tret1-1* upregulation upon starvation.

308 *Jelly belly/Anaplastic lymphoma kinase signaling does not regulate Tret1-1*  
309 *expression*

310 *Tret1-1* upregulation upon starvation is likely a mechanism to spare the  
311 nervous system from the effects of restricted nutrient availability. Jelly belly  
312 (*Jeb*)/Anaplastic lymphoma kinase (ALK) signaling is important to allow  
313 continued developmental brain growth even upon poor nutrition (Cheng et al.,  
314 2011). To analyze if this pathway might also play a role in adapting  
315 carbohydrate transport, we knocked down *jeb* and *Alk* in all glial cells and  
316 analyzed *Tret1-1* expression. *Alk* knockdown in the glial cells did not induce a  
317 *Tret1-1* expression phenotype (Figure S3). *Tret1-1* is still upregulated upon  
318 starvation, indicating that ALK signaling in glial cells is not involved in *Tret1-1*  
319 regulation (Figure S3). *jeb* knockdown in all glial cells induced strong  
320 starvation susceptibility of the animals in our hands. Most animals died within  
321 the 48 h starvation period and analyzing *Tret1-1* expression in the perineurial  
322 glial cells of escapers did not give coherent results. Nevertheless, since *Alk*  
323 knockdown shows wild typical *Tret1-1* upregulation, *Jeb*/ALK signaling is most  
324 likely not implicated in the regulation of carbohydrate transport upon  
325 starvation.

326 *Transforming growth factor  $\beta$  signaling regulates Tret1-1 expression*

327 In *Drosophila*, both TGF- $\beta$ /Activin signaling and TGF- $\beta$ /bone morphogenetic  
328 protein (BMP) signaling have been implicated in metabolic regulation (Ballard  
329 et al., 2010; Ghosh and O'Connor, 2014). The Activin and BMP branches of  
330 TGF- $\beta$  signaling share some components, like the type II receptors Punt (Put)  
331 and Wishful thinking (Wit) and the co-Smad Medea, while other components  
332 are specific to one or the other branch (reviewed in Upadhyay et al., 2017),  
333 Figure 6C).

334 Since Put has been implicated in regulating carbohydrate homeostasis, we  
335 asked if Put-dependent TGF- $\beta$  signaling could also play a role in  
336 carbohydrate-dependent Tret1-1 regulation. Thus, we expressed dsRNA  
337 constructs against *put* in a glia-specific manner and analyzed Tret1-1 levels in  
338 the perineurial glial cells of fed and starved animals (Figure 6). Indeed,  
339 starvation-dependent upregulation of Tret1-1 was completely abolished upon  
340 *put* knockdown in the glial cells using either *put*<sup>KK102676</sup> or *put*<sup>GD2545</sup>.  
341 Quantification shows no upregulation of Tret1-1 upon starvation in *put*  
342 knockdown animals (Figure 6B). In contrast, knockdown of *wit* using  
343 *wit*<sup>KK100911</sup>, did not affect Tret1-1 upregulation upon starvation (Figure 6). This  
344 data suggests, that Put-dependent TGF- $\beta$  signaling in glia is essential for  
345 starvation-induced upregulation of Tret1-1.

346 The Activin-branch of TGF- $\beta$  signaling has been shown to be important for  
347 sugar sensing and sugar metabolism in the adult fly as well as in larvae (Chng  
348 et al., 2014; Ghosh and O'Connor, 2014; Mattila et al., 2015). The type I  
349 receptor Baboon (Babo) is specific for the Activin branch of TGF- $\beta$  signaling  
350 (reviewed in Upadhyay et al., 2017); Figure 6C). Thus, we silenced *babo* in  
351 glial cells using *babo*<sup>NIG8224R</sup> that has been shown to efficiently abolish *babo*  
352 expression (Hevia and de Celis, 2013). Interestingly, in *babo* knockdown  
353 animals Tret1-1 expression is strongly upregulated upon starvation (Figure 6),  
354 indicating that the Activin-branch of TGF- $\beta$  signaling is not implicated in Tret1-  
355 1 regulation.

356 This indicates that the BMP-branch of TGF- $\beta$  signaling is implicated in *tret1-1*  
357 regulation. To analyze its involvement, we knocked down the BMP branch-  
358 specific type I receptors Thickveins (Tkv) and Saxophone (Sax) (reviewed in

359 Upadhyay et al., 2017). Loss-of-function mutations in both *tkv* and *sax* are  
360 lethal, but *Tkv* overexpression can rescue *sax* loss-of-function, thus *Tkv*  
361 seems to be the primary type I receptor in the BMP-branch of TGF- $\beta$  signaling  
362 (Brummel et al., 1994). Glia-specific knockdown of *sax* using *sax*<sup>GD50</sup> or  
363 *sax*<sup>GD2546</sup> did not show any differences in *Tret1-1* regulation upon starvation  
364 compared to control knockdown animals (Figure 6). In contrast, knockdown of  
365 *tkv* using *tkv*<sup>KK102319</sup> abolished *Tret1-1* upregulation upon starvation,  
366 highlighting its importance for signaling (Figure 6).

367 *Glass-bottom boat-mediated TGF- $\beta$  signaling induces Tret1-1 expression*  
368 *upon starvation*

369 The BMP branch of TGF- $\beta$  signaling can be activated by several ligands,  
370 Glass-bottom boat (*Gbb*), Decapentaplegic (*Dpp*), Screw (*Scw*) and probably  
371 *Maverick* (*Mav*) (reviewed in Upadhyay et al., 2017). Of those ligands only  
372 *Gbb* has been implicated in regulating metabolic processes so far (reviewed  
373 in Upadhyay et al., 2017). *gbb*<sup>-/-</sup> mutant animals show a phenotype that  
374 resembles the state of starvation, including reduced triacylglyceride storage  
375 and lower circulating carbohydrate levels (Ballard et al., 2010). It has  
376 previously been shown that overexpression of *Gbb* in the fatbody leads to  
377 higher levels of circulating carbohydrates and thus the opposite of a  
378 starvation-like phenotype (Hong et al., 2016a). Thus, to study their role in  
379 *Tret1-1* regulation, we over-expressed *Gbb* or *Dpp* locally in the surface glial  
380 cells (9137-Gal4, perineurial and subperineurial glial cells) to avoid strong  
381 systemic impact that would counteract the effects of starvation. In fed animals  
382 that express *Gbb* in the BBB-cells *Tret1-1* expression is significantly  
383 upregulated in the perineurial glial cells (Figure 7). This effect is specific to  
384 *Gbb*, since neither GFP-expressing control animals nor *Dpp*-expressing  
385 animals display this effect (Figure 7). This shows that *Gbb*-dependent  
386 signaling does induce *Tret1-1* upregulation.

387 Taken together, the data reported here show that, upon starvation, moderate  
388 levels of *Gbb* are produced by an unknown source, probably locally in the  
389 subperineurial glial cells. *Gbb* activates the BMP-branch of TGF- $\beta$  signaling in  
390 the perineurial glial cells, via the receptors *Tkv* (type I) and *Put* (type II) and

391 induces Tret1-1 expression. Since it has been shown that mammalian GLUT1  
392 is also upregulated upon hypoglycemia, it will be interesting to see whether  
393 TGF- $\beta$  signaling is conserved as a pathway adapting carbohydrate transport  
394 to changes in nutrient availability.

## 395 **Discussion**

396 The nervous system is separated from circulation by the BBB. This separation  
397 on one hand protects the nervous system from circulation-derived harmful  
398 substances, but on the other hand necessitates efficient nutrient transport to  
399 ensure neuronal function. Since the nervous system mainly uses  
400 carbohydrates to meet its energetic demands, carbohydrates need to be  
401 taken up at a sufficient rate. We previously showed that the carbohydrate  
402 transporter Tret1-1 is specifically expressed in perineurial glial cells that  
403 surround the *Drosophila* brain and that glucose is taken up into the nervous  
404 system (Volkenhoff et al., 2018, 2015). Here, we investigated how Tret1-1-  
405 mediated carbohydrate uptake into the nervous system is adapted to the  
406 metabolic state of the animal to spare the nervous system from the effects of  
407 malnutrition. We show that Tret1-1 is a carbohydrate transporter that cannot  
408 only facilitate transport of trehalose as previously reported (Kanamori et al.,  
409 2010), but also of glucose (Figure 4). Upon chronic starvation Tret1-1 protein  
410 levels are increased in the perineurial glial cells (Figure 1), boosting the  
411 glucose transport capacity in those cells (Figure 4). Even though we cannot  
412 exclude additional upregulation of other carbohydrate transporters, the data  
413 shown here indicates that Tret1-1 upregulation is a mechanism to ensure  
414 efficient carbohydrate uptake, even when circulating carbohydrate levels are  
415 low.

416 Subcellular trafficking of Tret1-1 is important for Tret1-1 homeostasis and its  
417 integration into the plasma membrane, which is increased upon starvation  
418 (Figure 1, 2). Loss of Rab7 or Rab10 function has severe effects on Tret1-1  
419 levels or localization. The intracellular accumulation of Tret1-1 induced by  
420 Rab10 silencing indicates that Tret1-1 cannot be properly delivered to the  
421 plasma membrane. Loss of Rab10 function in mammalian adipocytes induces  
422 perinuclear accumulation of GLUT4, suggesting regulatory parallels between



423 Tret1-1 and GLUT4 (Sano et al., 2007). GLUT4 (*Slc2a4*) is weakly expressed  
424 in the mammalian BBB (James et al., 1988; McCall et al., 1997). Also, the two  
425 closest GLUT-homologues of Tret1-1, GLUT6 and GLUT8, are regulated by  
426 subcellular trafficking from cytoplasmic storage vesicle to the plasma  
427 membrane (FlyBase, Lisinski et al., 2001). Both, GLUT6 and GLUT8 are  
428 expressed in the mammalian brain, but their roles are unclear (H. Doege et  
429 al., 2000; Holger Doege et al., 2000; Ibberson et al., 2000; Reagan et al.,  
430 2002).

431 We show that the *tret1-1* promoter is induced upon starvation (Figure 3). This  
432 suggests that the *tret1-1* locus harbors a starvation-responsive element.  
433 Tret1-1 levels are most likely regulated dependent on carbohydrate  
434 availability, since animals feeding on sugar-only food do not show an  
435 upregulation of Tret1-1 (Figure 1). It has been reported that insulin-induced  
436 hypoglycemia leads to an upregulation of GLUT1 mRNA as well as protein in  
437 rat BBB-forming endothelial cells (Kumagai et al., 1995). In isolated rat brain  
438 microvessels insulin-induced hypoglycemia also activates upregulation of  
439 GLUT1 protein levels and in addition an accumulation of GLUT1 at the luminal  
440 membrane (Simpson et al., 1999). In these rodent studies, GLUT1  
441 upregulation was detected upon insulin injection that induces hypoglycemia.  
442 Under starvation conditions that lead to hypoglycemia in our experimental  
443 setup, however, insulin levels are strongly reduced. If under high insulin  
444 conditions GLUT1 levels are increased in mammals, this increase cannot be  
445 triggered by a loss of insulin. Along the same lines, the upregulation of Tret1-1  
446 in perineurial glial cells we report here is independent of insulin signaling as  
447 well as AKH signaling (Figure 5). Thus, the regulatory mechanisms reported  
448 here may be conserved. This is especially interesting since aberrations in  
449 Glut1 functionality or levels can cause severe diseases, like e.g. Glut1  
450 deficiency syndrome or Alzheimer's (reviewed in Koepsell, 2020). Therefore,  
451 understanding the mechanisms that control the expression of carbohydrate  
452 transporters in the BBB-forming cells might be the basis for developing a  
453 treatment that allows to correct non-sufficient transporter expression in such  
454 diseases.



455 The induction of carbohydrate transport at the BBB upon hypoglycemia or  
456 starvation seems to be a mechanism that is required to spare the brain from  
457 the effects of malnutrition. It has previously been shown in mammals, as well  
458 as in flies, that the developing nervous system is protected from such effects  
459 to allow proper brain growth, while other organs undergo severe growth  
460 restriction. This process is called asymmetric intra-uterine growth restriction in  
461 humans or “brain sparing” in model organisms (reviewed in Lanet and  
462 Maurange, 2014). In *Drosophila*, the mechanisms that underly the protection  
463 of the brain have been studied. Here, Jelly belly (Jeb)/Anaplastic lymphoma  
464 kinase (ALK) signaling in the neuroblast niche circumvents the need for  
465 insulin signaling to propagate growth (reviewed in Lanet and Maurange,  
466 2014). Interestingly, Jeb/ALK signaling is not the basis for Tret1-1  
467 upregulation in the perineurial glial cells, since glial ALK knockdown does not  
468 abolish Tret1-1 induction upon starvation (Figure 6).

469 TGF- $\beta$  signaling has been shown to be involved in metabolic regulation in  
470 vertebrates and invertebrates (Andersson et al., 2008; Bertolino et al., 2008;  
471 Ghosh and O'Connor, 2014; Zamani and Brown, 2011). In *Drosophila*, the  
472 Activin-like ligand Dawdle as well as the BMP ligand Glass-bottom boat have  
473 been implicated in metabolic regulation (reviewed in Upadhyay et al., 2017).  
474 Daw seems to be one of the primary players in the conserved  
475 ChREBP/MondoA-Mlx complex-dependent sugar-sensing pathway (Mattila et  
476 al., 2015). However, since the Activin-like branch of TGF- $\beta$  signaling does not  
477 play a role in Tret1-1 regulation, it does not seem to affect carbohydrate  
478 uptake into the nervous system. The BMP ligand Gbb, on the other hand, has  
479 been implicated in nutrient storage regulation. *gbb* mutants show expression  
480 defects of several starvation response genes (Ballard et al., 2010).  
481 Furthermore, the fat body of fed *gbb* mutants resembles that of starved wild  
482 type animals by its nutrient storage and morphology (Ballard et al., 2010).  
483 Gbb seems to be regulating nutrient storage in the fat body and fat body  
484 morphology in a cell-autonomous manner, but since *gbb* mutants display  
485 increased nutrient uptake rates, *gbb* signaling also has systemic effects that  
486 are not yet completely understood (Ballard et al., 2010; Hong et al., 2016b).  
487 We show here that moderate levels of Gbb signaling induce an upregulation

488 of Tret1-1 expression in perineurial glial cells (Figure 7). Gbb signals via Tkv  
489 and Put to regulate Tret1-1 expression upon starvation (Figure 6).  
490 Interestingly, it has been shown that Bmp signaling induces transcriptional  
491 upregulation of Glut1 in chondrocytes during murine skeletal development  
492 (Lee et al., 2018). Thus, TGF- $\beta$  dependent regulation of carbohydrate  
493 transport at the BBB may be based on the same mechanisms and  
494 consequently be evolutionarily conserved.

495 Interestingly, the transcription of the *Drosophila* sodium/solute cotransporter  
496 cupcake has also been shown to be upregulated upon starvation. Cupcake is  
497 expressed in some ellipsoid body neurons upon starvation and is essential for  
498 the ability of the animal to choose feeding on a nutritive sugar over feeding on  
499 a sweeter non-nutritive sugar after a period of nutrient deprivation.  
500 Furthermore, several solute carrier family members have been shown to be  
501 regulated by carbohydrate availability in mouse cortical cell culture (Ceder et  
502 al., 2020). It will be very interesting to investigate whether such transcriptional  
503 upregulation is also mediated by TGF- $\beta$  signaling and if TGF- $\beta$ -mediated  
504 transcriptional regulation in the nervous system is a central mechanism that  
505 allows survival under nutrient shortage.

506 In summary, we report here a potentially conserved mechanism that spares  
507 the nervous system from effects of nutrient shortage by upregulation of  
508 carbohydrate transport at the BBB. This upregulation renders carbohydrate  
509 uptake more efficient and most likely allows sufficient carbohydrate uptake  
510 even when circulating carbohydrate levels are low. In *Drosophila*,  
511 compensatory upregulation of Tret1-1 is regulated via Gbb and the BMP  
512 branch of TGF- $\beta$  signaling. This mechanism is likely to be evolutionarily  
513 conserved, since mammalian Glut1 has been shown to be regulated via BMP  
514 signaling in other tissues (Lee et al., 2018) and thus might in the future allow  
515 designing a treatment against diseases caused by non-sufficient carbohydrate  
516 transport in the nervous system.

517 **Acknowledgement**

518 We are grateful to M. Brankatschk for fly stocks. We thank Astrid Fleige for  
519 help with cloning and Western blots. We are grateful to C. Klämbt for  
520 discussions and critical reading of the manuscript. The work was supported by  
521 grants of the DFG to SS (SFB1009, SCHI 1380/2-1).

## 522 **Author contribution**

523 H.H. designed and conducted most experiments, helped conceiving the study  
524 and wrote the paper with S.S.; E.M. conducted the FRET experiments and  
525 helped writing the paper; A.W. conducted the *Xenopus* experiments together  
526 with H.M.B.; A.V. generated the *tret1-1-Gal4* and *tret1-1-stg-GFP* flies; H.M.B.  
527 designed the *Xenopus* experiments and helped conducting them; S.S.  
528 conceived the study, assisted in designing and interpreting experiments,  
529 wrote the paper with H.H. and E.M. and obtained funding from the DFG.

## 530 **Declaration of interest**

531 The authors declare no competing interests.

## 532 **Materials and Methods**

533 All experiments have been conducted at least 3 times independently of each  
534 other to assess interexperimental variation. In each experiment several  
535 animals have been used to assess variations between animals. N gives the  
536 number of independent experiments; n is the total number of animals  
537 analyzed. If not noted otherwise, immunostainings have been done 3 times  
538 independently including several animals in each experiment.

### 539 *Fly stocks*

540 Flies were kept at 25 °C on a standard diet if not noted otherwise. The  
541 following fly stocks were used in this study: *jeb*<sup>KK111857</sup>, *jeb*<sup>GD5472</sup>, *Alk*<sup>GD42</sup>,  
542 *put*<sup>KK102676</sup>, *put*<sup>GD2545</sup>, *wit*<sup>KK100911</sup>, *sax*<sup>GD50</sup>, *sax*<sup>GD2546</sup>, *tkv*<sup>KK102319</sup>, *Rab10*<sup>GD13212</sup>,  
543 *Rab10*<sup>GD16778</sup>, *Rab10*<sup>KK109210</sup> (all fly stocks were obtained from VDRC fly  
544 center). *Rab7*<sup>T22N</sup>, *Rab10*<sup>T23N</sup>, *Rab7*<sup>EYFP</sup>, *Rab10*<sup>EYFP</sup>, *Rab19*<sup>EYFP</sup>, *Rab23*<sup>EYFP</sup>,  
545 *Rab7*<sup>TRIP.JF02377</sup>, *InR*<sup>K1409A</sup>, *InR*<sup>R418P</sup>, UAS-dpp (BDSC 1486), mCherry<sup>dsRNA</sup>  
546 (BDSC 35785), UAS-CD8-GFP (BDSC 30002 or 30003) (all fly stocks were

547 obtained from Bloomington Drosophila stock center). Akh<sup>AP</sup> and Akh<sup>SAP</sup>  
548 (Gáliková et al., 2015), babo<sup>NIG8224R</sup> (Japanese National Institute of Genetics),  
549 gliotactin-Gal4, repo-Gal4 (Sepp et al., 2001), 46F-Gal4 (Xie and Auld, 2011),  
550 9137-Gal4 (Desalvo et al., 2014), UAS-FLII<sup>12</sup>Pglu-700μδ6 (Volkenhoff et al.,  
551 2018), UAS-Gbb (P. Soba), UAS-RFP (S. Heuser), w<sup>1118</sup> (Lindsley and Zimm,  
552 1992).

### 553 *Creation of Tret1-1-Gal4 and Tret1-1-stinger-GFP flies*

554 For creation of Tret1-1-Gal4 and Tret1-1-stinger-GFP flies, first the promotor  
555 region of *tret1-1* was cloned from genomic DNA (forward primer:  
556 CACCGGTCTCAAGCTCTCTTTTTGCCTTACATATTTT, reverse primer:  
557 TGGGTAAGTTGGAGAGAGAG) into the pENTR<sup>TM</sup> vector using the  
558 pENTR<sup>TM</sup>/D- TOPO<sup>®</sup> Cloning Kit (Thermofisher). Via the gateway system, the  
559 promotor fragment was cloned either into the pBPGuwGal4 vector (addgene  
560 #17575) or into pBPGuw-stingerGFP. Both clones were introduced into the  
561 86Fb landing site via  $\Phi$  integrase-mediated transgenesis (Bischof et al.,  
562 2007).

### 563 *Immunohistochemistry, SDS Page and Western blotting*

564 Third instar larval brains or larval brains of animals that had been subjected to  
565 the larval starvation protocol, were dissected and immunostained following  
566 standard protocols (Volkenhoff et al., 2015). Specimen were analyzed using  
567 the Zeiss 710 LSM or the Zeiss 880 LSM and the Airy Scan Module (Zeiss,  
568 Oberkochen, Germany). SDS Page and Western blotting was performed  
569 following published protocols (Zobel et al., 2015). Lysates were generated  
570 from 96 h +/- 3 h old larval brains.

571 The following antibodies were used: guinea pig anti-Tret1-1 (1:50, Volkenhoff  
572 et al., 2015), rabbit anti-Laminin (1:1000, Abcam), mouse anti-Repo (1:2,  
573 Developmental Studies Hybridoma Bank), mouse anti-GFP (for  
574 immunohistochemistry 1:1000, Molecular Probes; for Western blotting:  
575 1:10000, Clontech), mouse anti-Tubulin (1:80, Developmental Studies  
576 Hybridoma Bank), rabbit anti-Apontic (1:150, Eulenberg and Schuh, 1997). As  
577 secondary conjugated antibodies, Alexa488- (1:1000), Alexa568- (1:1000)  
578 and Alexa647-coupled (1:500) antibodies were used (all from Thermo Fisher

579 Scientific). For Western blotting, goat anti-mouse HRP (Dianova, 1:7500) was  
580 used. HRP activity was detected using the ECL detection system kit (GE  
581 Healthcare) and the Amersham Imager 680 (GE Healthcare). Image analysis  
582 was performed using the Fiji plugin of ImageJ (1.52p, java 1.8.0.\_172 64-bit,  
583 NIH, Bethesda, Maryland).

#### 584 *Larval starvation*

585 Flies were kept overnight on standard food to stage the embryos. 42 h after  
586 staging similar sized larvae were collected, cleared from food and transferred  
587 to different food conditions: standard food, water-soaked filter paper or 10 %  
588 sucrose in PBS. They were kept for 48 h on this condition before dissecting.  
589 For fluorescent analysis, mean grey values of a region of interest (ROI)  
590 containing the entire tip of the ventral nerve cord were measured. The mean  
591 of values of seven single planes was taken. To obtain comparable values  
592 between experiments, the ratio of values received from starved animals to fed  
593 animals was calculated. Statistical analysis was performed using Sigma Plot  
594 software (Jadel). Differences were assessed by the Mann-Whitney Rank Sum  
595 test or t-test. P values < 0.05 were considered as significantly different.

#### 596 *Measurement of glucose uptake*

597 Larvae expressing *UAS-FLII<sup>12</sup>Pglu-700 $\mu$  $\delta$ 6* FRET glucose sensor under the  
598 control of 9137-Gal4 were kept on standard food or under starvation  
599 conditions following the larval starvation protocol. Larval brains were  
600 subsequently dissected in HL3 buffer (70 mM NaCl, 5 mM KCl, 20 mM MgCl<sub>2</sub>,  
601 10 mM NaHCO<sub>3</sub>, 115 mM sucrose, 5mM trehalose, 5 mM HEPES; pH 7.2; ca.  
602 350 mOsm) and adhered to Poly-D-Lysine-coated coverslips. Coverslips were  
603 secured into a flow through chamber and mounted to the stage of a LSM880  
604 confocal microscope (Zeiss, Oberkochen, Germany). The chamber was then  
605 connected to a mini-peristaltic pump (MPII, Harvard Apparatus) to allow buffer  
606 exchange.

607 Fluorescent images were acquired immediately after dissection using 20x/1,0  
608 DIC M27 75mm emersion objective (Zeiss, Oberkochen, Germany) with  
609 excitation 436/25 nm, beam splitter 455 nm, emission 480/40 nm (CFP  
610 channel); excitation 436/25 nm, beam splitter 455 nm, emission 535/30 nm

611 (YFP channel). Each larval brain was imaged in a separate experiment  
612 (n=10). After 2.5 minutes, HL3 buffer was exchanged for glucose buffer (HL3  
613 supplemented with 10 mM glucose; pH 7.2) and replaced by HL3 again after a  
614 further 7.5 minutes.

615 For data analysis, a ROI containing the entire larval brain was selected and  
616 the mean grey value of all pixels minus background for each channel was  
617 calculated. Values were normalized to known minimum (HL3 buffer).  
618 Statistical and regression analysis of data obtained was performed using  
619 SigmaPlot software (Jandel). To determine glucose uptake rates, 10 time  
620 points 9 seconds after values rose above baseline levels were used to  
621 calculate the linear slope of each curve. Differences were assessed by the  
622 Mann-Whitney Rank Sum test (pairs). P values < 0.05 were considered as  
623 significantly different.

624

#### 625 *Xenopus experiments*

626 For isolation of oocytes, female *X. laevis* frogs (purchased from the Radboud  
627 University, Nijmegen, Netherlands) were anesthetized with 1 g/l of Ethyl 3-  
628 aminobenzoate methanesulfonate and rendered hypothermic. Parts of ovarian  
629 lobules were surgically removed under sterile conditions. The procedure was  
630 approved by the Landesuntersuchungsamt Rheinland-Pfalz, Koblenz (23 177-  
631 07/A07-2-003 §6). Oocytes were singularized by collagenase treatment in  
632 Ca<sup>2+</sup>-free oocyte saline (82.5 mM NaCl, 2.5 mM KCl, 1 mM MgCl<sub>2</sub>, 1 mM  
633 Na<sub>2</sub>HPO<sub>4</sub>, 5 mM HEPES, pH 7.8, 2 mg/l gentamicin) at 28 °C for 2 h. The  
634 singularized oocytes were stored overnight at 18 °C in Ca<sup>2+</sup>-containing oocyte  
635 saline (82.5 mM NaCl, 2.5 mM KCl, 1 mM CaCl<sub>2</sub>, 1 mM MgCl<sub>2</sub>, 1 mM  
636 Na<sub>2</sub>HPO<sub>4</sub>, 5 mM HEPES, pH 7.8, 2 mg/l gentamicin). The procedure was  
637 described in detail previously (Becker, 2014).

638 For heterologous protein expression in *X. laevis* oocytes the *D. melanogaster*  
639 cDNA sequences of Tret1-1 isoform A was amplified via PCR from pUAST-  
640 Tret1-1-PA-3xHA plasmid (forward primer:  
641 CGTCTAGAATGAGTGGACGCGAC, reverse primer:  
642 CGAAGCTTCTAGCTTACGTCACGT) and cloned into the pGEM-He-Juel  
643 vector using XbaI/ HindIII restriction sites. cRNA was produced by *in vitro*  
644 transcription using the mMESAGE mMACHINE<sup>®</sup> T7 Kit (Fisher Scientific).



645 Oocytes of the stages V and VI were injected with 18 ng (for mass  
646 spectrometry) to 20 ng (for scintillation analysis) of cRNA and measurements  
647 were carried out three to six days after cRNA injection.

648 To analyze the transport capacity by scintillation measurements radioactive  
649 sugar substrates were generated using unlabeled sugar solutions of different  
650 concentrations in oocyte saline and adding  $^{14}\text{C}$ -labeled sugar at a  
651 concentration of 0.15  $\mu\text{Ci}/100\ \mu\text{l}$  (for 0.3 mM to 30 mM solutions) or  
652 0.3  $\mu\text{Ci}/100\ \mu\text{l}$  (for 100 mM and 300 mM solutions).  $^{14}\text{C}_{12}$ -trehalose was  
653 purchased from Hartmann Analytic, Braunschweig (#1249),  $^{14}\text{C}_6$ -glucose and  
654  $^{14}\text{C}_6$ -fructose were purchased from Biotrend, Köln (#MC144-50 and 66  
655 #MC1459-50). Six to eight oocytes were transferred into a test tube and  
656 washed with oocyte saline. Oocyte saline was removed completely and 95  $\mu\text{l}$   
657 of the sugar substrate were added for 60 min. After incubation, cells were  
658 washed four times with 4 ml ice-cold oocyte saline. Single oocytes were  
659 transferred into Pico Prias scintillation vials (Perkin Elmer) and lysed in 200  $\mu\text{l}$   
660 5 % SDS, shaking at approximately 190 rpm for at least 30 min at 20 to 28 °C.  
661 3 ml Rotiszint® eco plus scintillation cocktail (Carl Roth) were added to each  
662 vial and scintillation was measured using the Tri-Carb 2810TR scintillation  
663 counter (Perkin Elmer). Scintillation of 10  $\mu\text{l}$  sugar substrate of each  
664 concentration with 200  $\mu\text{l}$  5 % SDS and 3 ml Rotiszint® eco plus scintillation  
665 cocktail served as a standard.

666 Substrate flux was calculated from the measured scintillation according to the  
667 respective standard measurements. For statistical analysis, the medium flux  
668 and standard error were calculated for oocytes expressing transport proteins  
669 and native oocytes and compared using a one-sided t-test or the Man-  
670 Whitney Rank test for analysis of non-uniformly distributed samples.  
671 Determination of the net-flux was performed by subtracting the medium flux of  
672 native oocytes from one test series from each measurement of the same test  
673 series and calculating the medium flux and standard error.

## 674 **References**

675 Andersson O, Korach-Andre M, Reissmann E, Ibáñez CF, Bertolino P. 2008.  
676 Growth/differentiation factor 3 signals through ALK7 and regulates



- 677 accumulation of adipose tissue and diet-induced obesity. *Proc Natl Acad*  
678 *Sci U S A* **105**:7252–7256. doi:10.1073/pnas.0800272105
- 679 Arsov T, Mullen SA, Damiano JA, Lawrence KM, Huh LL, Nolan M, Young H,  
680 Thouin A, Dahl H-HM, Berkovic SF, Crompton DE, Sadleir LG, Scheffer  
681 IE. 2012. Early onset absence epilepsy: 1 in 10 cases is caused by  
682 GLUT1 deficiency. *Epilepsia* **53**:e204–e207. doi:10.1111/epi.12007
- 683 Ballard SL, Jarolimova J, Wharton KA. 2010. Gbb/BMP signaling is required  
684 to maintain energy homeostasis in *Drosophila*. *Dev Biol* **337**:375–385.
- 685 Begley DJ. 2006. Structure and function of the blood-brain  
686 barrierEnhancement in Drug Delivery.  
687 doi:10.3389/conf.fphar.2010.02.00002
- 688 Bertolino P, Holmberg R, Reissmann E, Andersson O, Berggren PO, Ibáñez  
689 CF. 2008. Activin B receptor ALK7 is a negative regulator of pancreatic  $\beta$ -  
690 cell function. *Proc Natl Acad Sci U S A* **105**:7246–7251.  
691 doi:10.1073/pnas.0801285105
- 692 Blatt J, Roces F. 2001. Haemolymph sugar levels in foraging honeybees (*Apis*  
693 *mellifera carnica*): dependence on metabolic rate and in vivo  
694 measurement of maximal rates of trehalose synthesis. *J Exp Biol*  
695 **204**:2709–16.
- 696 Boado RJ, Pardridge WM. 1993. Glucose Deprivation Causes  
697 Posttranscriptional Enhancement of Brain Capillary Endothelial Glucose  
698 Transporter Gene Expression via GLUT1 mRNA Stabilization. *J*  
699 *Neurochem* **60**:2290–2296. doi:10.1111/j.1471-4159.1993.tb03516.x
- 700 Broughton S, Alic N, Slack C, Bass T, Ikeya T, Vinti G, Tommasi AM, Drieger  
701 Y, Hafen E, Partridge L. 2008. Reduction of DILP2 in *Drosophila* triages a  
702 metabolic phenotype from lifespan revealing redundancy and  
703 compensation among DILPs. *PLoS One* **3**:e3721.
- 704 Brummel TJ, Twombly V, Marqués G, Wrana JL, Newfeld SJ, Attisano L,  
705 Massagué J, O'Connor MB, Gelbart WM. 1994. Characterization and  
706 relationship of dpp receptors encoded by the saxophone and thick veins  
707 genes in *Drosophila*. *Cell* **78**:251–261. doi:10.1016/0092-8674(94)90295-  
708 X
- 709 Ceder MM, Lekholm E, Klaesson A, Tripathi R, Schweizer N, Weldai L, Patil  
710 S, Fredriksson R. 2020. Glucose Availability Alters Gene and Protein

- 711 Expression of Several Newly Classified and Putative Solute Carriers in  
712 Mice Cortex Cell Culture and *D. melanogaster*. *Front Cell Dev Biol* **8**:579.  
713 doi:10.3389/fcell.2020.00579
- 714 Cheng LY, Bailey AP, Leever SJ, Ragan TJ, Driscoll PC, Gould AP. 2011.  
715 Anaplastic Lymphoma Kinase Spares Organ Growth during Nutrient  
716 Restriction in *Drosophila*. *Cell* **146**:435–447.  
717 doi:10.1016/j.cell.2011.06.040
- 718 Chng WA, Sleiman MSB, Schüpfer F, Lemaitre B. 2014. Transforming Growth  
719 Factor  $\beta$ /Activin Signaling Functions as a Sugar-Sensing Feedback Loop  
720 to Regulate Digestive Enzyme Expression. *Cell Rep* **9**:336–348.  
721 doi:<https://doi.org/10.1016/j.celrep.2014.08.064>
- 722 Çiçek İÖ, Karaca S, Brankatschk M, Eaton S, Urlaub H, Shcherbata HR.  
723 2016. Hedgehog Signaling Strength Is Orchestrated by the  $\text{mir-310}$   
724 Cluster of MicroRNAs in Response to Diet. *Genetics*  
725 **202**:1167 LP – 1183. doi:10.1534/genetics.115.185371
- 726 Corvera S, Chawla A, Chakrabarti R, Joly M, Buxton J, Czech MP. 1994. A  
727 double leucine within the GLUT4 glucose transporter COOH-terminal  
728 domain functions as an endocytosis signal. *J Cell Biol* **126**:979–989.  
729 doi:10.1083/jcb.126.4.979
- 730 Croset V, Treiber CD, Waddell S. 2018. Cellular diversity in the *Drosophila*  
731 midbrain revealed by single-cell transcriptomics. *Elife* **7**:e34550.  
732 doi:10.7554/eLife.34550
- 733 Cushman SW, Wardzala LJ. 1980. Potential mechanism of insulin action on  
734 glucose transport in the isolated rat adipose cell. Apparent translocation  
735 of intracellular transport systems to the plasma membrane. *J Biol Chem*  
736 **255**:4758–4762.
- 737 Davie K, Janssens J, Koldere D, De Waegeneer M, Pech U, Kreft Ł, Aibar S,  
738 Makhzami S, Christiaens V, Bravo González-Blas C, Poovathingal S,  
739 Hulselmans G, Spanier KI, Moerman T, Vanspauwen B, Geurs S, Voet T,  
740 Lammertyn J, Thienpont B, Liu S, Konstantinides N, Fiers M, Verstreken  
741 P, Aerts S. 2018. A Single-Cell Transcriptome Atlas of the Aging  
742 *Drosophila* Brain. *Cell* **174**:982-998.e20. doi:10.1016/j.cell.2018.05.057
- 743 Desalvo MK, Hindle SJ, Rusan ZM, Orng S, Eddison M, Halliwill K, Bainton  
744 RJ. 2014. The *Drosophila* surface glia transcriptome: evolutionary

- 745 conserved blood-brain barrier processes. *Front Neurosci* **8**:346.
- 746 Doege H., Bocianski A, Joost HG, Schürmann A. 2000. Activity and genomic  
747 organization of human glucose transporter 9 (GLUT9), a novel member of  
748 the family of sugar-transport facilitators predominantly expressed in brain  
749 and leucocytes. *Biochem J* **350 Pt 3**:771–776. doi:10.1042/0264-  
750 6021:3500771
- 751 Doege Holger, Schürmann A, Bahrenberg G, Brauers A, Joost HG. 2000.  
752 GLUT8, a novel member of the sugar transport facilitator family with  
753 glucose transport activity. *J Biol Chem* **275**:16275–16280.  
754 doi:10.1074/jbc.275.21.16275
- 755 Dunst S, Kazimiers T, von Zadow F, Jambor H, Sagner A, Brankatschk B,  
756 Mahmoud A, Spann S, Tomancak P, Eaton S, Brankatschk M. 2015.  
757 Endogenously tagged rab proteins: a resource to study membrane  
758 trafficking in *Drosophila*. *Dev Cell* **33**:351–365.
- 759 Dus M, Min S, Keene AC, Lee GY, Suh GSB. 2011. Taste-independent  
760 detection of the caloric content of sugar in *Drosophila*. *Proc*  
761 *Natl Acad Sci* **108**:11644 LP – 11649.
- 762 Elfeber K, Köhler A, Lutzenburg M, Osswald C, Galla HJ, Witte OW, Koepsell  
763 H. 2004. Localization of the Na<sup>+</sup>-D-glucose cotransporter SGLT1 in the  
764 blood-brain barrier. *Histochem Cell Biol* **121**:201–207.  
765 doi:10.1007/s00418-004-0633-9
- 766 Enerson BE, Drewes LR. 2006. The rat blood-brain barrier transcriptome. *J*  
767 *Cereb Blood Flow Metab* **26**:959–973. doi:10.1038/sj.jcbfm.9600249
- 768 Eulenberg KG, Schuh R. 1997. The tracheae defective gene encodes a bZIP  
769 protein that controls tracheal cell movement during *Drosophila*  
770 embryogenesis. *EMBO J* **16**:7156–7165. doi:10.1093/emboj/16.23.7156
- 771 Gálíková M, Diesner M, Klepsatel P, Hehlert P, Xu Y, Bickmeyer I, Predel R,  
772 Kühnlein RP. 2015. Energy Homeostasis Control in *Drosophila*  
773 Adipokinetic Hormone Mutants. *Genetics* **201**:665–683.  
774 doi:10.1534/genetics.115.178897
- 775 Ghosh AC, O'Connor MB. 2014. Systemic Activin signaling independently  
776 regulates sugar homeostasis, cellular metabolism, and pH balance in  
777 *Drosophila melanogaster*. *Proc Natl Acad Sci U S A* **111**:5729–5734.  
778 doi:10.1073/pnas.1319116111

- 779 Guerra F, Bucci C. 2016. Multiple Roles of the Small GTPase Rab7. *Cells*  
780 **5**:34. doi:10.3390/cells5030034
- 781 Harris JJ, Jolivet R, Attwell D. 2012. Synaptic energy use and supply. *Neuron*  
782 **75**:762–777.
- 783 Hevia CF, de Celis JF. 2013. Activation and function of TGF $\beta$  signalling  
784 during *Drosophila* wing development and its interactions with the BMP  
785 pathway. *Dev Biol* **377**:138–153.  
786 doi:<https://doi.org/10.1016/j.ydbio.2013.02.004>
- 787 Hindle SJ, Bainton RJ. 2014. Barrier mechanisms in the *Drosophila* blood-  
788 brain barrier. *Front Neurosci* **8**:414.
- 789 Ho T-Y, Wu W-H, Hung S-J, Liu T, Lee Y-M, Liu Y-H. 2019. Expressional  
790 Profiling of Carpet Glia in the Developing *Drosophila* Eye Reveals Its  
791 Molecular Signature of Morphology Regulators. *Front Neurosci* **13**:244.  
792 doi:10.3389/fnins.2019.00244
- 793 Hoffmann U, Sukhotinsky I, Eikermann-Haerter K, Ayata C. 2013. Glucose  
794 modulation of spreading depression susceptibility. *J Cereb Blood Flow*  
795 *Metab* **33**:191–195. doi:10.1038/jcbfm.2012.132
- 796 Hong S-H, Kang M, Lee K-S, Yu K. 2016a. High fat diet-induced TGF- $\beta$ /Gbb  
797 signaling provokes insulin resistance through the tribbles expression. *Sci*  
798 *Rep* **6**:30265. doi:10.1038/srep30265
- 799 Hong S-H, Kang M, Lee K-S, Yu K. 2016b. High fat diet-induced TGF- $\beta$ /Gbb  
800 signaling provokes insulin resistance through the tribbles expression. *Sci*  
801 *Rep* **6**:30265. doi:10.1038/srep30265
- 802 Huotari J, Helenius A. 2011. Endosome maturation. *EMBO J* **30**:3481–3500.  
803 doi:10.1038/emboj.2011.286
- 804 Ibberson M, Uldry M, Thorens B. 2000. GLUTX1, a novel mammalian glucose  
805 transporter expressed in the central nervous system and insulin-sensitive  
806 tissues. *J Biol Chem* **275**:4607–4612. doi:10.1074/jbc.275.7.4607
- 807 James DE, Brown R, Navarro J, Pilch PF. 1988. Insulin-regulatable tissues  
808 express a unique insulin-sensitive glucose transport protein. *Nature*  
809 **333**:183–185. doi:10.1038/333183a0
- 810 Kanamori Y, Saito A, Hagiwara-Komoda Y, Tanaka D, Mitsumasu K, Kikuta S,  
811 Watanabe M, Cornette R, Kikawada T, Okuda T. 2010. The trehalose  
812 transporter 1 gene sequence is conserved in insects and encodes

- 813 proteins with different kinetic properties involved in trehalose import into  
814 peripheral tissues. *Insect Biochem Mol Biol* **40**:30–37.
- 815 Kapogiannis D, Mattson MP. 2011. Disrupted energy metabolism and  
816 neuronal circuit dysfunction in cognitive impairment and Alzheimer's  
817 disease. *Lancet Neurol* **10**:187–198. doi:10.1016/S1474-4422(10)70277-  
818 5
- 819 Klip A, McGraw TE, James DE. 2019. Thirty sweet years of GLUT4. *J Biol*  
820 *Chem* **294**:11369–11381. doi:10.1074/jbc.REV119.008351
- 821 Koepsell H. 2020. Glucose transporters in brain in health and disease.  
822 *Pflügers Arch - Eur J Physiol*. doi:10.1007/s00424-020-02441-x
- 823 Kumagai AK, Kang Y-S, Boado RJ, Pardridge WM. 1995. Upregulation of  
824 Blood-Brain Barrier GLUT1 Glucose Transporter Protein and mRNA in  
825 Experimental Chronic Hypoglycemia. *Diabetes* **44**:1399 LP – 1404.  
826 doi:10.2337/diab.44.12.1399
- 827 Kuzawa CW, Chugani HT, Grossman LI, Lipovich L, Muzik O, Hof PR,  
828 Wildman DE, Sherwood CC, Leonard WR, Lange N. 2014. Metabolic  
829 costs and evolutionary implications of human brain development. *Proc*  
830 *Natl Acad Sci U S A* **111**:13010–13015. doi:10.1073/pnas.1323099111
- 831 Lane NJ, Treherne JE. 1972. Studies on perineurial junctional complexes and  
832 the sites of uptake of microperoxidase and lanthanum in the cockroach  
833 central nervous system. *Tissue Cell* **4**:427–436.  
834 doi:[https://doi.org/10.1016/S0040-8166\(72\)80019-3](https://doi.org/10.1016/S0040-8166(72)80019-3)
- 835 Lanet E, Maurange C. 2014. Building a brain under nutritional restriction:  
836 insights on sparing and plasticity from Drosophila studies. *Front Physiol*  
837 **5**:117. doi:10.3389/fphys.2014.00117
- 838 Laughlin SB, de Ruyter Van Steveninck RR, Anderson JC. 1998. The  
839 metabolic cost of neural information. *Nat Neurosci* **1**:36–41.  
840 doi:10.1038/236
- 841 Lee G, Park JH. 2004. Hemolymph Sugar Homeostasis and Starvation-  
842 Induced Hyperactivity Affected by Genetic Manipulations of the  
843 Adipokinetic Hormone-Encoding Gene in *Drosophila melanogaster*.  
844 *Genetics* **167**:311–323.
- 845 Lee S-Y, Abel ED, Long F. 2018. Glucose metabolism induced by Bmp  
846 signaling is essential for murine skeletal development. *Nat Commun*

- 847           **9**:4831. doi:10.1038/s41467-018-07316-5
- 848   Limmer S, Weiler A, Volkenhoff A, Babatz F, Klämbt C. 2014. The *Drosophila*  
849       blood-brain barrier: development and function of a glial endothelium.  
850       *Front Neurosci* **8**:365.
- 851   Lindsley DL, Zimm GG. 1992. The Genome of *Drosophila Melanogaster*.  
852       Elsevier Science.
- 853   Lisinski I, Schürmann A, Joost HG, Cushman SW, Al-Hasani H. 2001.  
854       Targeting of GLUT6 (formerly GLUT9) and GLUT8 in rat adipose cells.  
855       *Biochem J* **358**:517–522. doi:10.1042/0264-6021:3580517
- 856   Matsuda H, Yamada T, Yoshida M, Nishimura T. 2015. Flies without  
857       trehalose. *J Biol Chem* **290**:1244–1255. doi:10.1074/jbc.M114.619411
- 858   Mattila J, Havula E, Suominen E, Teesalu M, Surakka I, Hynynen R, Kilpinen  
859       H, Väänänen J, Hovatta I, Käkälä R, Ripatti S, Sandmann T, Hietakangas  
860       V. 2015. Mondo-Mlx Mediates Organismal Sugar Sensing through the  
861       Gli-Similar Transcription Factor Sugarbabe. *Cell Rep* **132**:350–364.  
862       doi:10.1016/j.celrep.2015.08.081
- 863   Mayer CM, Belsham DD. 2009. Insulin directly regulates NPY and AgRP gene  
864       expression via the MAPK MEK/ERK signal transduction pathway in  
865       mHypoE-46 hypothalamic neurons. *Mol Cell Endocrinol* **307**:99–108.
- 866   McCall AL, Van Bueren AM, Huang L, Stenbit A, Celnik E, Charron MJ. 1997.  
867       Forebrain endothelium expresses GLUT4, the insulin-responsive glucose  
868       transporter. *Brain Res* **744**:318–326. doi:10.1016/S0006-8993(96)01122-  
869       5
- 870   Mink JW, Blumenschine RJ, Adams DB. 1981. Ratio of central nervous  
871       system to body metabolism in vertebrates: Its constancy and functional  
872       basis. *Am J Physiol - Regul Integr Comp Physiol* **241**:R203–R212.  
873       doi:10.1152/ajpregu.1981.241.3.r203
- 874   Nagy P, Szatmári Z, Sándor GO, Lippai M, Hegedűs K, Juhász G. 2017.  
875       &lt;em&gt;*Drosophila*&/em&gt; Atg16 promotes enteroendocrine cell  
876       differentiation via regulation of intestinal Slit/Robo signaling. *Development*  
877       **144**:3990 LP – 4001. doi:10.1242/dev.147033
- 878   Nässel DR, Liu Y, Luo J. 2015. Insulin/IGF signaling and its regulation in  
879       *Drosophila*. *Gen Comp Endocrinol* **221**:255–266.  
880       doi:<https://doi.org/10.1016/j.ygcen.2014.11.021>



- 881 Nishizaki T, Kammesheidt A, Sumikawa K, Asada T, Okada Y. 1995. A  
882 sodium- and energy-dependent glucose transporter with similarities to  
883 SGLT1-2 is expressed in bovine cortical vessels. *Neurosci Res* **22**:13–22.  
884 doi:10.1016/0168-0102(95)00876-U
- 885 Nishizaki T, Matsuoka T. 1998. Low glucose enhances Na<sup>+</sup>/glucose transport  
886 in bovine brain artery endothelial cells. *Stroke* **29**:844–849.  
887 doi:10.1161/01.STR.29.4.844
- 888 Pasco MY, Léopold P. 2012. High sugar-induced insulin resistance in  
889 *Drosophila* relies on the lipocalin Neural Lazarillo. *PLoS One* **7**:e36583.
- 890 Pataki C, Matusek T, Kurucz É, Andó I, Jenny A, Mihály J. 2010. *Drosophila*  
891 Rab23 Is Involved in the Regulation of the Number and Planar  
892 Polarization of the Adult Cuticular Hairs. *Genetics* **184**:1051 LP – 1065.  
893 doi:10.1534/genetics.109.112060
- 894 Patching SG. 2016. Glucose Transporters at the Blood-Brain Barrier:  
895 Function, Regulation and Gateways for Drug Delivery. *Mol Neurobiol*  
896 **54**:1046–1077.
- 897 Reagan LP, Rosell DR, Alves SE, Hoskin EK, McCall AL, Charron MJ,  
898 McEwen BS. 2002. GLUT8 glucose transporter is localized to excitatory  
899 and inhibitory neurons in the rat hippocampus. *Brain Res* **932**:129–134.  
900 doi:10.1016/S0006-8993(02)02308-9
- 901 Rehni AK, Dave KR. 2018. Impact of Hypoglycemia on Brain Metabolism  
902 During Diabetes. *Mol Neurobiol*. doi:10.1007/s12035-018-1044-6
- 903 Sano H, Eiguez L, Teruel MN, Fukuda M, Chuang TD, Chavez JA, Lienhard  
904 GE, McGraw TE. 2007. Rab10, a Target of the AS160 Rab GAP, Is  
905 Required for Insulin-Stimulated Translocation of GLUT4 to the Adipocyte  
906 Plasma Membrane. *Cell Metab* **5**:293–303.  
907 doi:10.1016/j.cmet.2007.03.001
- 908 Simpson IA, Appel NM, Hokari M, Oki J, Holman GD, Maher F, Koehler-Stec  
909 EM, Vannucci SJ, Smith QR. 1999. Blood-brain barrier glucose  
910 transporter: Effects of hypo- and hyperglycemia revisited. *J Neurochem*.  
911 doi:10.1046/j.1471-4159.1999.0720238.x
- 912 Stork T, Engelen D, Krudewig A, Silies M, Bainton RJ, Klambt C. 2008.  
913 Organization and Function of the Blood Brain Barrier in *Drosophila*. *J*  
914 *Neurosci* **28**:587–597.



- 915 Suzuki K, Kono T. 1980. Evidence that insulin causes translocation of glucose  
916 transport activity to the plasma membrane from an intracellular storage  
917 site. *Proc Natl Acad Sci U S A* **77**:2542–2545.  
918 doi:10.1073/pnas.77.5.2542
- 919 Takanaga H, Chaudhuri B, Frommer WB. 2008. GLUT1 and GLUT9 as major  
920 contributors to glucose influx in HepG2 cells identified by a high  
921 sensitivity intramolecular FRET glucose sensor. *Biochim Biophys Acta -*  
922 *Biomembr* **1778**:1091–1099. doi:10.1016/j.bbamem.2007.11.015
- 923 Upadhyay A, Moss-Taylor L, Kim M-J, Ghosh AC, O'Connor MB. 2017. TGF-  
924  $\beta$  Family Signaling in *Drosophila*. *Cold Spring Harb Perspect Biol* **9**.
- 925 van de Waterbeemd H, Camenisch G, Folkers G, Chretien JR, Raevsky OA.  
926 1998. Estimation of blood-brain barrier crossing of drugs using molecular  
927 size and shape, and H-bonding descriptors. *J Drug Target* 151–165.  
928 doi:10.3109/10611869808997889
- 929 Vemula S, Roder KE, Yang T, Bhat GJ, Thekkumkara TJ, Abbruscato TJ.  
930 2009. A functional role for sodium-dependent glucose transport across  
931 the blood-brain barrier during oxygen glucose deprivation. *J Pharmacol*  
932 *Exp Ther* **328**:487–95. doi:10.1124/jpet.108.146589
- 933 Volkenhoff A, Hirrlinger J, Kappel JM, Klämbt C, Schirmeier S. 2018. Live  
934 imaging using a FRET glucose sensor reveals glucose delivery to all cell  
935 types in the *Drosophila* brain. *J Insect Physiol* **106**:55–64.  
936 doi:<https://doi.org/10.1016/j.jinsphys.2017.07.010>
- 937 Volkenhoff A, Weiler A, Letzel M, Stehling M, Klämbt C, Schirmeier S. 2015.  
938 Glial Glycolysis Is Essential for Neuronal Survival in *Drosophila*. *Cell*  
939 *Metab* **22**:437–447. doi:10.1016/j.cmet.2015.07.006
- 940 Weiler A, Volkenhoff A, Hertenstein H, Schirmeier S. 2017. Metabolite  
941 transport across the mammalian and insect brain diffusion barriers.  
942 *Neurobiol Dis*. doi:10.1016/j.nbd.2017.02.008
- 943 Weizmann R, Hammonds AS, Celniker SE. 2009. Determination of gene  
944 expression patterns using high-throughput RNA in situ hybridization to  
945 whole-mount *Drosophila* embryos. *Nat Protoc* **4**:605–618.
- 946 Wyatt GR, Kalf GF. 1957. The chemistry of insect hemolymph: II. Trehalose  
947 and other carbohydrates. *J Gen Physiol* **40**:833–847.
- 948 Yildirim K, Petri J, Kottmeier R, Klämbt C. 2019. *Drosophila* glia: Few cell

949 types and many conserved functions. *Glia* **67**:5–26.  
950 doi:10.1002/glia.23459

951 Yu AS, Hirayama BA, Timbol G, Liu J, Diez-Sampedro A, Kepe V,  
952 Satyamurthy N, Huang SC, Wright EM, Barrio JR. 2013. Regional  
953 distribution of SGLT activity in rat brain in vivo. *Am J Physiol - Cell*  
954 *Physiol* **304**:C240–C247. doi:10.1152/ajpcell.00317.2012

955 Zamani N, Brown CW. 2011. Emerging roles for the transforming growth  
956 factor- $\beta$  superfamily in regulating adiposity and energy expenditure.  
957 *Endocr Rev*. doi:10.1210/er.2010-0018

958 Zinke I, Schütz CS, Katzenberger JD, Bauer M, Pankratz MJ. 2002. Nutrient  
959 control of gene expression in *Drosophila*: microarray analysis of  
960 starvation and sugar-dependent response. *EMBO J* **21**:6162–6173.

961 Zobel T, Brinkmann K, Koch N, Schneider K, Seemann E, Fleige A,  
962 Qualmann B, Kessels MM, Bogdan S. 2015. Cooperative functions of the  
963 two F-BAR proteins Cip4 and Nostrin in the regulation of E-cadherin in  
964 epithelial morphogenesis. *J Cell Sci* **128**:499 LP – 515.  
965 doi:10.1242/jcs.155929

966 Zülbahar S, Sieglitz F, Kottmeier R, Altenhein B, Rumpf S, Klämbt C. 2018.  
967 Differential expression of *öbek* controls ploidy in the *Drosophila* blood-  
968 brain barrier. *Dev* **145**. doi:10.1242/dev.164111

969

# Figure 1

## A

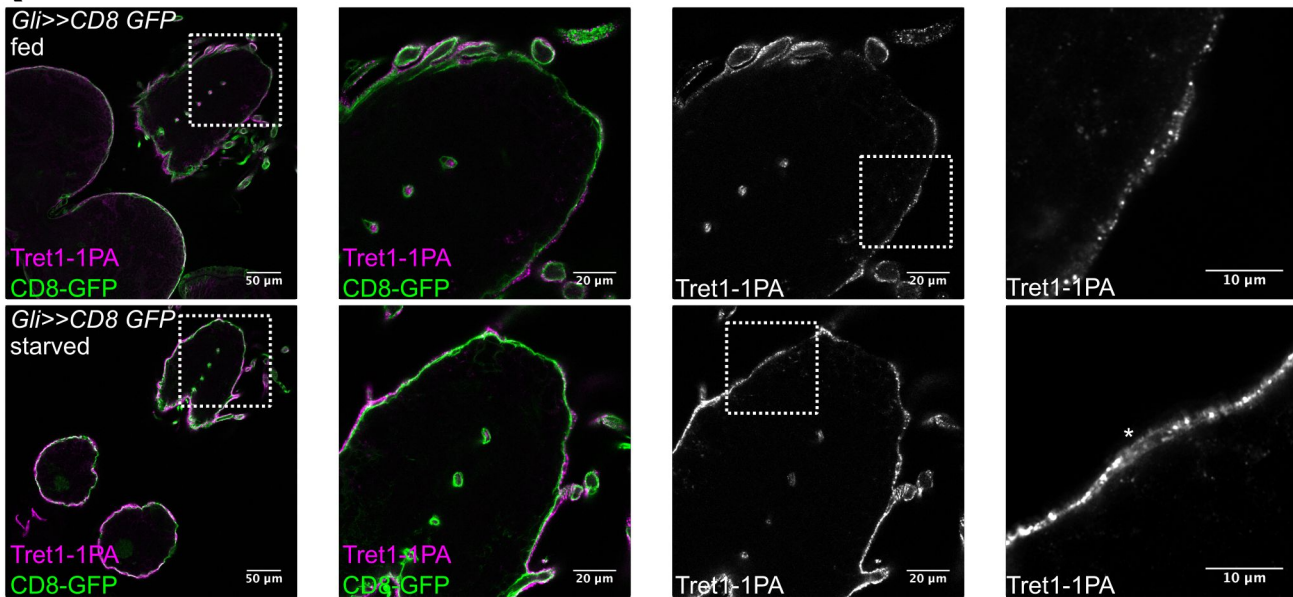

## B

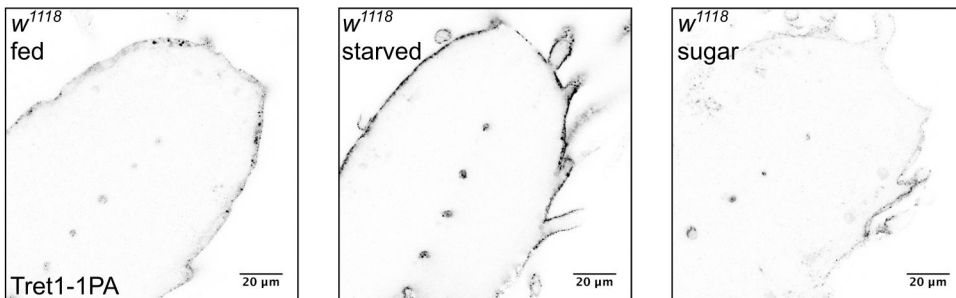

## C

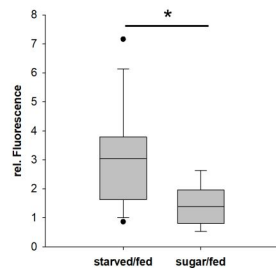

# Figure 2

## A

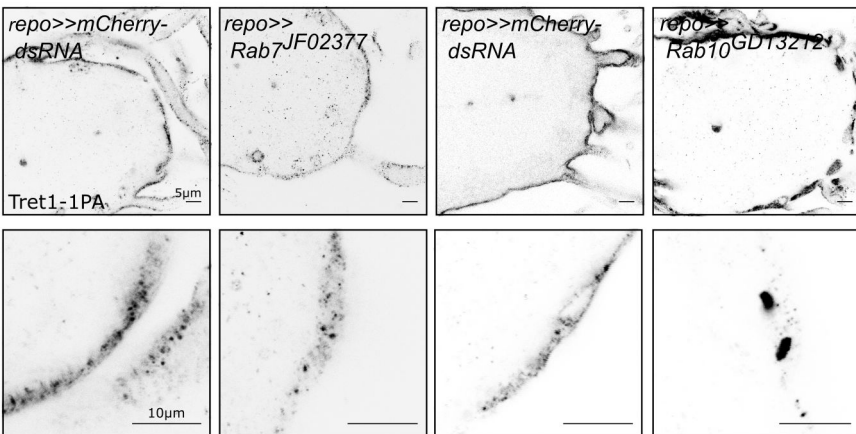

## B

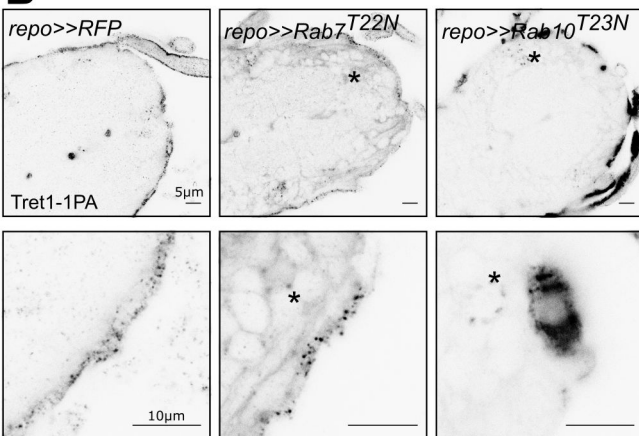

## C

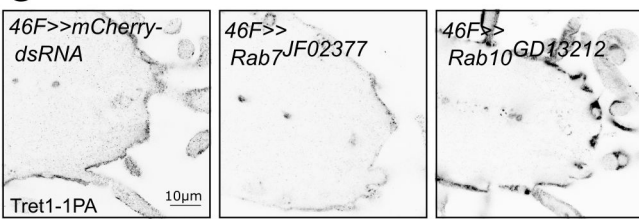

# Figure 3

## A

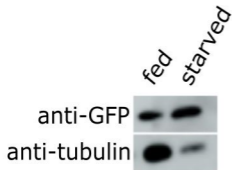

## B

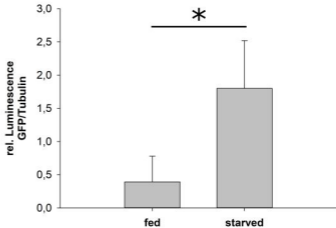

# Figure 4

## A

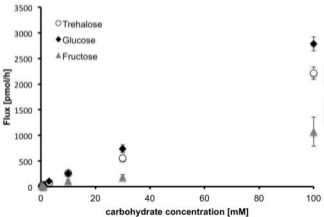

## B

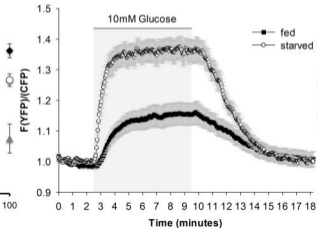

## C

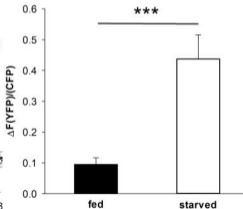

Figure 5

**A**

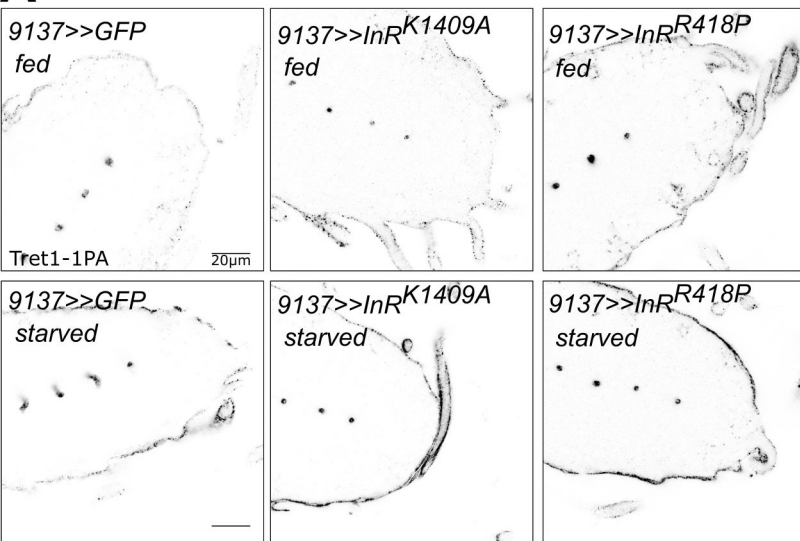

**B**

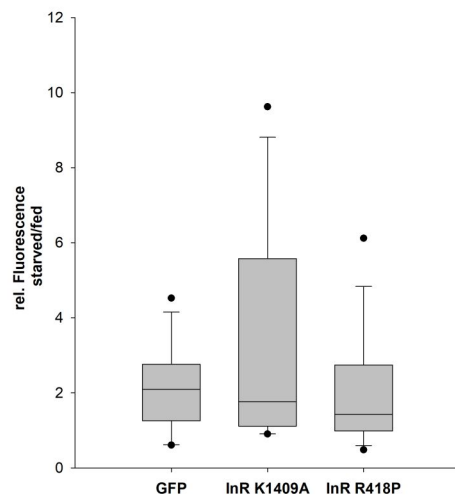

**C**

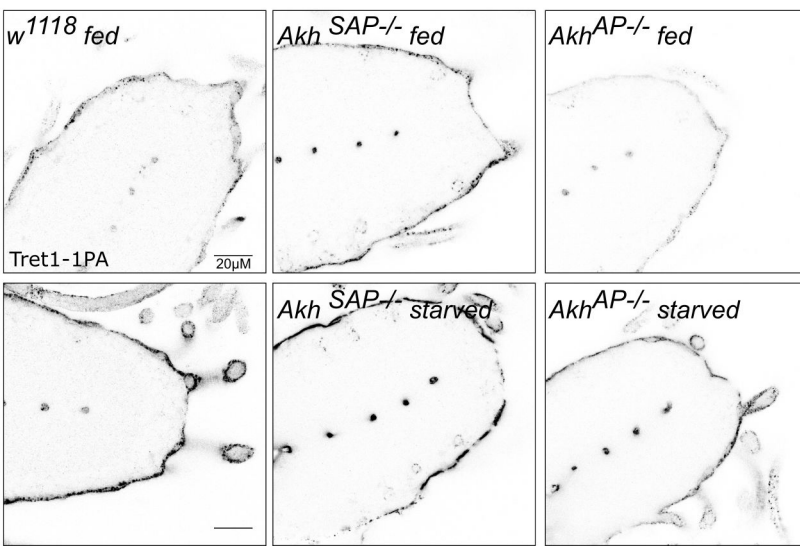

**D**

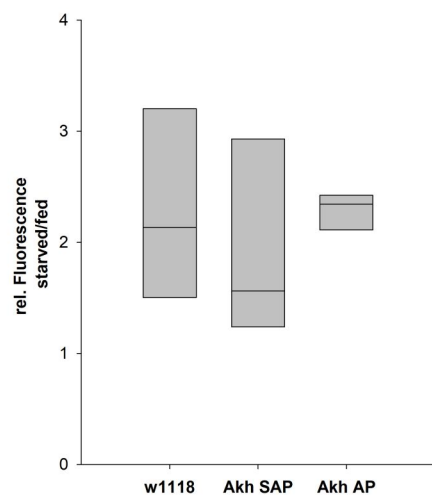



Figure 6

**A**

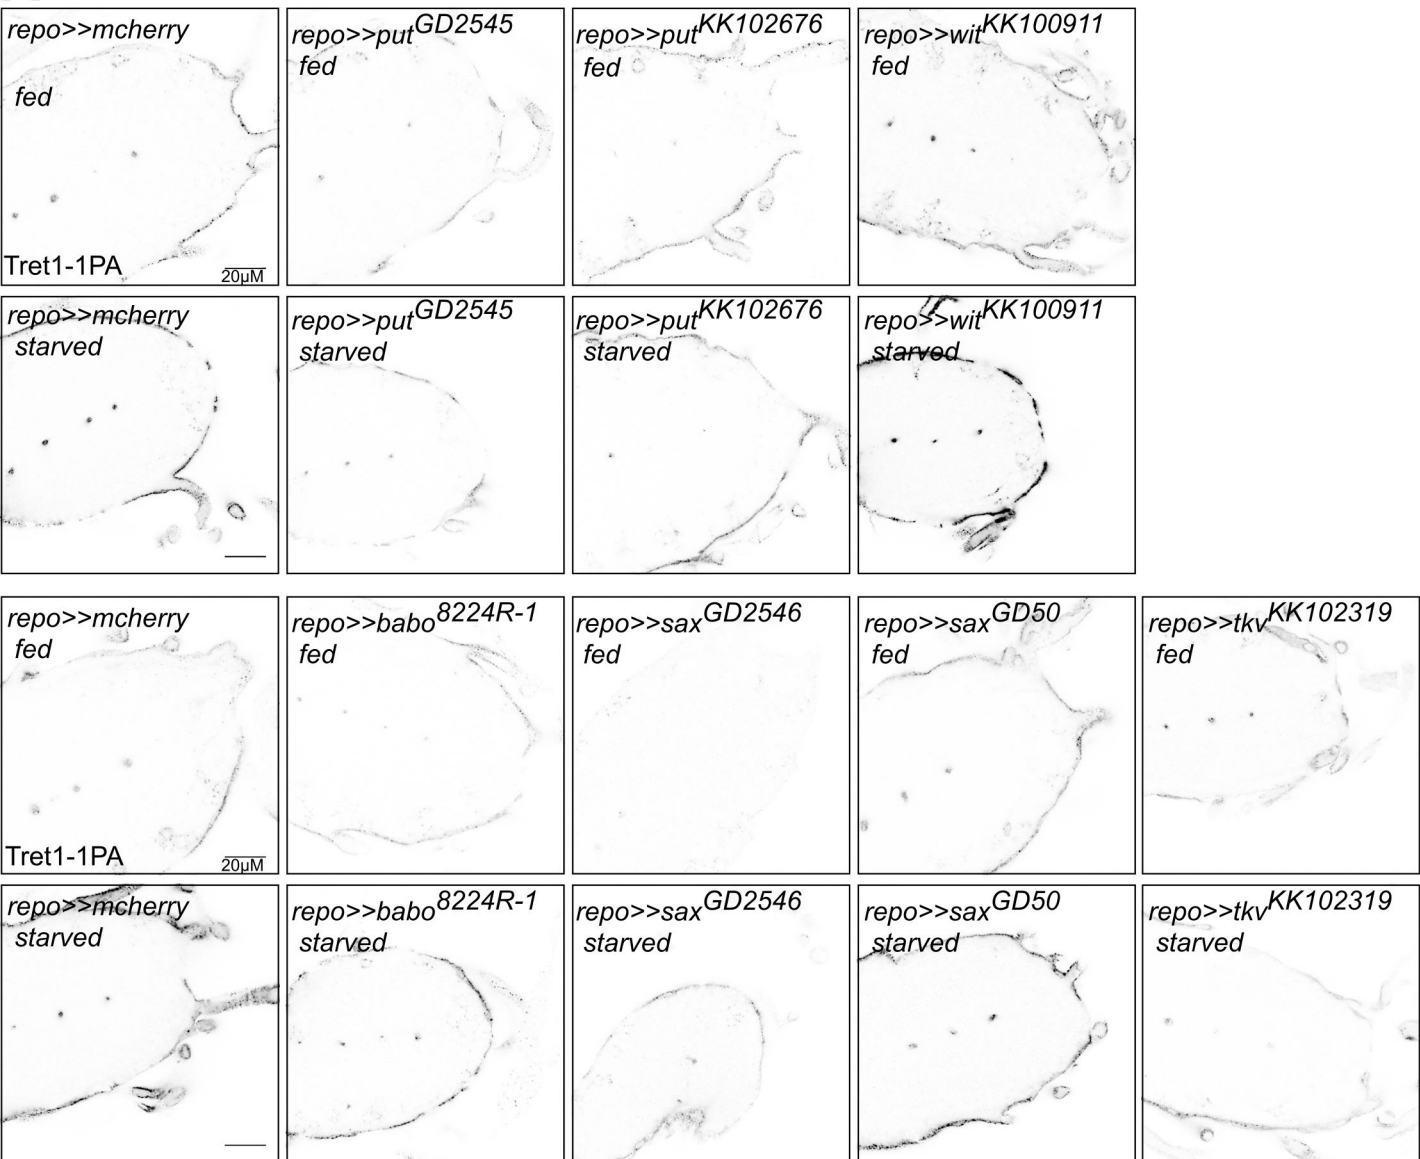

**B**

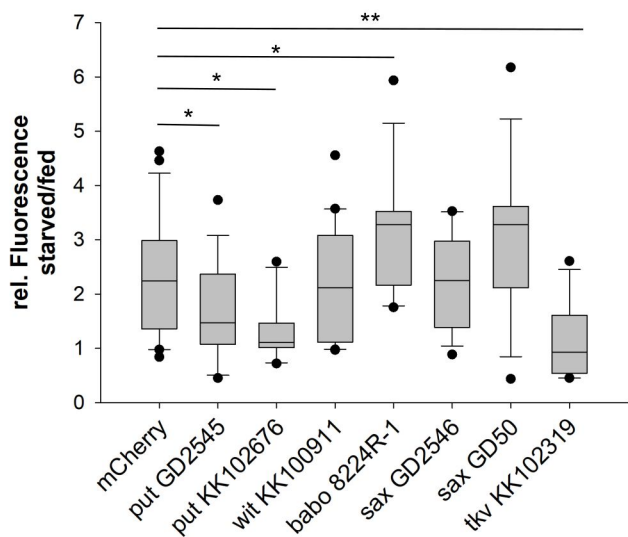

**C**

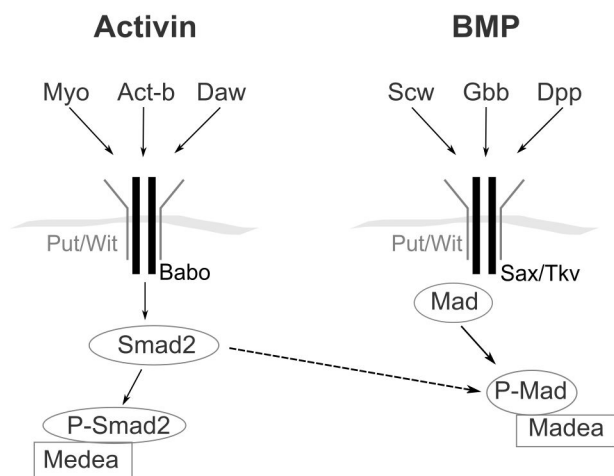

# Figure 7

## A

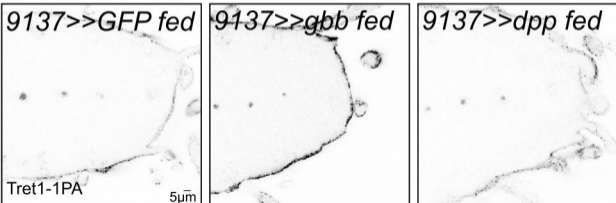

## B

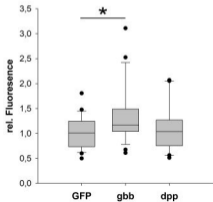

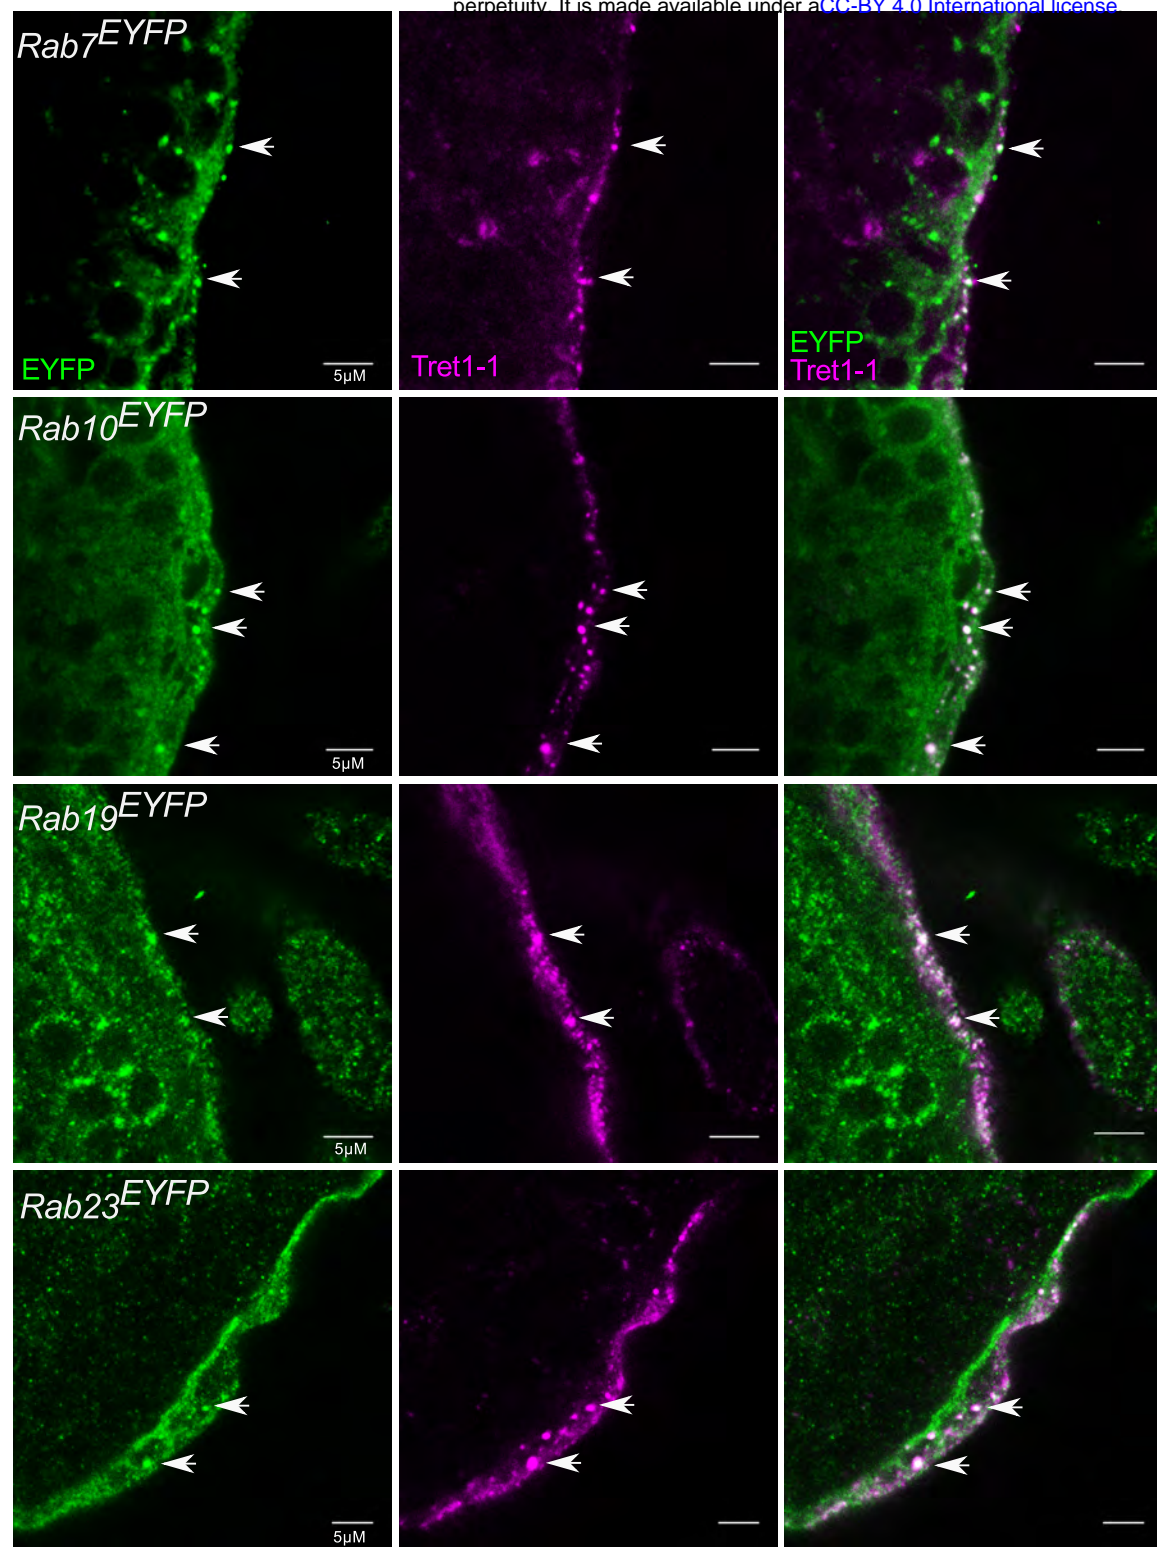

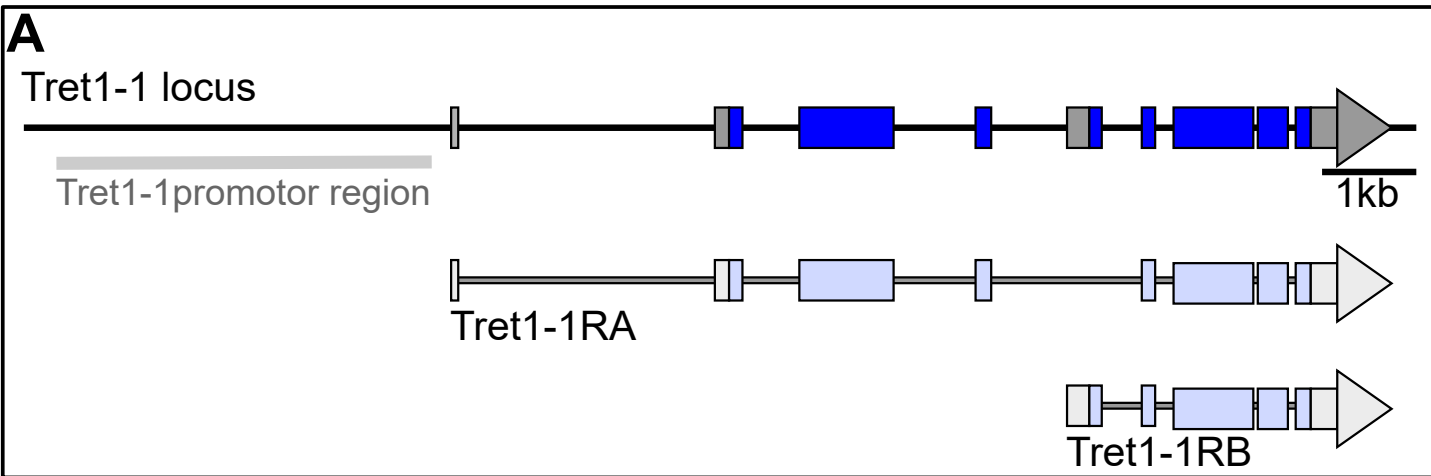

**B** *Tret1-1-Gal4>UAS-RFP*

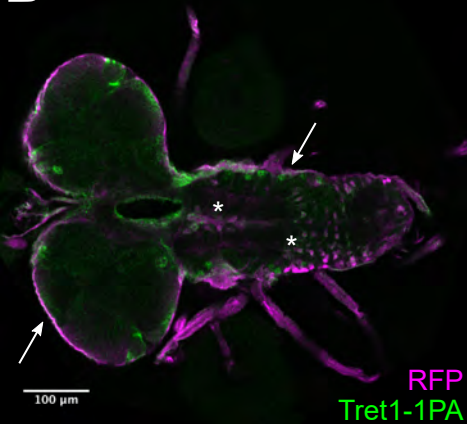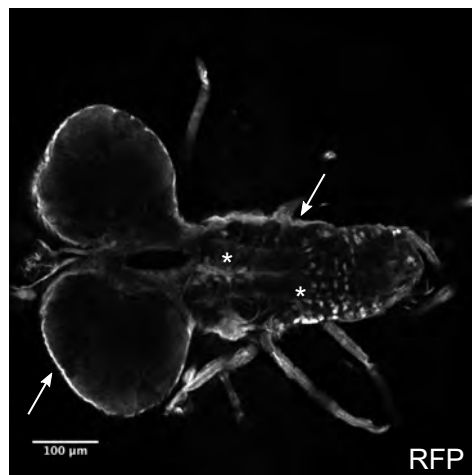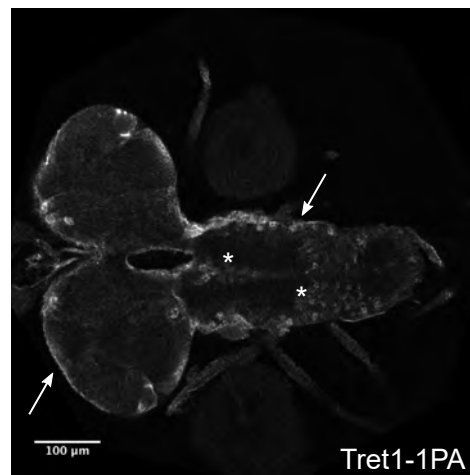

**C** *Tret1-1-stgGFP*

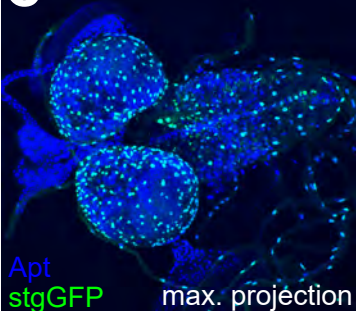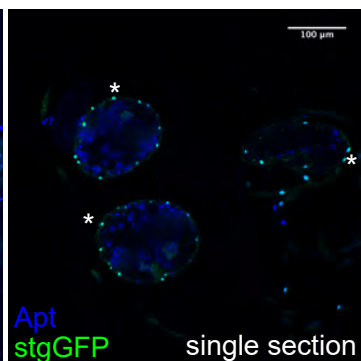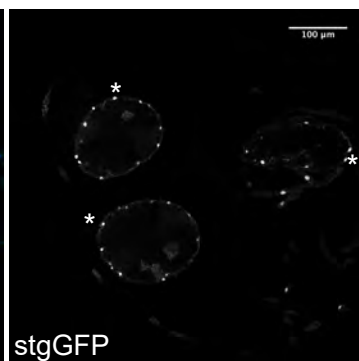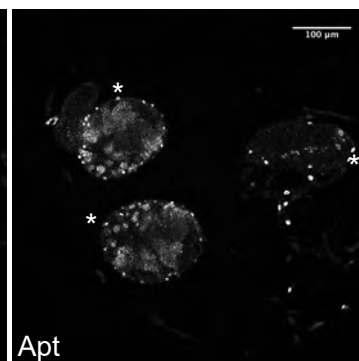

# Figure S3

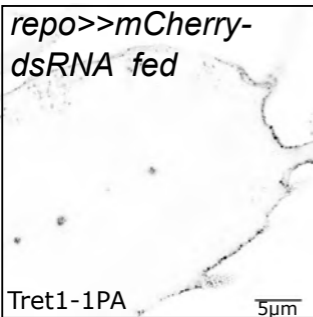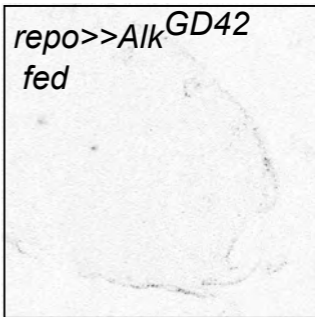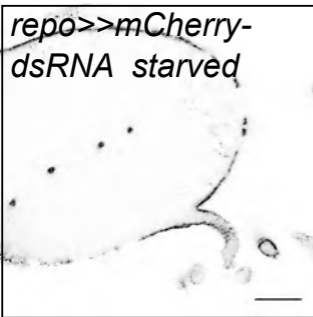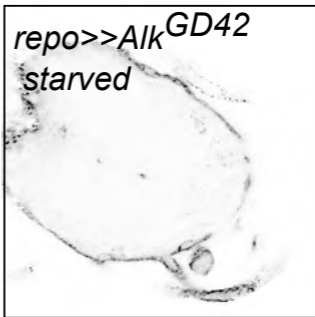

## Supplementary information

### Figure S1: Rab7, Rab10, Rab19 and Rab23 colocalize with Tret1-1 vesicles.

Co-staining of endogenous EYFP-tagged Rab-GTPases (green) and Tret1-1 (magenta) in the surface glia of third instar larval brains. All *Drosophila* Rab-GTPases endogenously labeled with EYFP were tested. Tret1-1-positive vesicles show overlapping staining with Rab7<sup>EYFP</sup>, Rab10<sup>EYFP</sup>, Rab19<sup>EYFP</sup> and Rab23<sup>EYFP</sup>.

### Figure S2: Tret1-1 promoter drives specific expression

**(A)** Schematic of the *tret1-1* locus and the transcripts encoding the two Tret1-1 isoforms. The *tret1-1* promoter region used to generate *tret1-1-Gal4* and *tret1-1-stgGFP* is highlighted in grey. **(B)** Tret1-1PA staining (green, grey) overlaps with *tret1-1*-driven RFP (magenta, grey) (*tret1-1-Gal4 UAS-RFP*), verifying the specificity of the *tret1-1* promoter region. **(C)** Co-staining of Apontic (blue, grey) and stgGFP (green, grey) that shows that *tret1-1*-driven stgGFP is specifically expressed in perineurial glial nuclei.

### Figure S3: Tret1-1 regulation upon starvation is ALK-independent

Tret1-1 staining of the ventral nerve cord of starved and fed control (*repo>>mCherry-dsRNA*) and *alk* knockdown (*repo>>alk<sup>GD42</sup>*) animals. Tret1-1 upregulation is still induced in starved *alk* knockdown animals.
